# Supplementary material for: Aryl tosylates as non-ionic photoacid generators (PAGs): photochemistry and applications in cationic photopolymerizations
Source: Royal Society of Chemistry journal article supplement (doi:10.1039/c5ra03522h), 2015-01-01

## **Aryl Tosylates as Non-Ionic Photoacid Generators (PAGs).**

### **Photochemistry and Applications in Cationic Photopolymerizations**

Edoardo Torti,<sup>‡</sup> Gioia Della Giustina,<sup>†</sup> Stefano Protti,<sup>\*,‡</sup> Daniele Merli,<sup>§</sup>  
Giovanna Brusatin,<sup>†</sup> Maurizio Fagnoni<sup>\*,‡</sup>

<sup>‡</sup> *Photogreen Lab, Department of Chemistry, University of Pavia, V. Le Taramelli 12, 27100 Pavia, Italy*

<sup>†</sup> *Department of Industrial Engineering, University of Padova, Via Marzolo 9, 35131 Padova, Italy*

<sup>§</sup> *Department of Chemistry, University of Pavia, V. Le Taramelli 12, 27100 Pavia, Italy*

*Fax: +39 0382 987323; Tel: +39 0382 987198. E-mail: fagnoni@unipv.it; prottistefano@gmail.com*

## **Supporting Information**

**37 Pages**

|           |                                                                                                                                             |            |
|-----------|---------------------------------------------------------------------------------------------------------------------------------------------|------------|
| <b>1</b>  | <b>Photophysical and photochemical data of aryl tosylates 1a-g</b>                                                                          | <b>S2</b>  |
| <b>2</b>  | <b>Potentiometric titrations of a 10<sup>-2</sup> M solution of compounds 1a-d, 1f-g after irradiation (t<sub>irr</sub> = 2 h) in MeOH.</b> | <b>S8</b>  |
| <b>3.</b> | <b>Irradiation and LFP experiments on 1b and 1d</b>                                                                                         | <b>S14</b> |
| <b>4.</b> | <b><sup>1</sup>H and <sup>13</sup>C spectra of compounds 1a-g, 3a, 3b, 3g</b>                                                               | <b>S16</b> |

## 1. Photophysical and photochemical data of aryl tosylates 1a-g.

**Table S1: Photophysical and photochemical data of aryl tosylates 1a-g in neat methanol.**

| ArOTs     | $\epsilon/L$ ( $\text{mol}^{-1} \text{cm}^{-1}$ ) <sup>a</sup> | $\lambda_{\text{em}}, \Phi_{\text{F}} \times 10^{-2}$ | $\Phi_{-1}$ <sup>b</sup> |
|-----------|----------------------------------------------------------------|-------------------------------------------------------|--------------------------|
| <b>1a</b> | 7400                                                           | 378, 0.31                                             | 0.11                     |
| <b>1b</b> | 1826                                                           | 344, 0.92                                             | 0.14                     |
| <b>1c</b> | 1131                                                           | -                                                     | 0.14                     |
| <b>1d</b> | 18900                                                          | -                                                     | 0.29                     |
| <b>1e</b> | 5510                                                           | -                                                     | < 0.01                   |
| <b>1f</b> | 2450                                                           | -                                                     | 0.11                     |
| <b>1g</b> | 1460                                                           | -                                                     | 0.21                     |

<sup>a</sup> Molar absorption coefficient at 254 nm. <sup>b</sup> Disappearance quantum yield measured on a  $10^{-2}$  M **1a-g** solution in MeOH ( $\lambda = 254$  nm,  $1 \times 15$  W Hg lamp) by using potassium ferrioxalate as actinometer.

**Table S2. Irradiation of Aryl Tosylate **1b** in Neat Solvents<sup>a</sup>**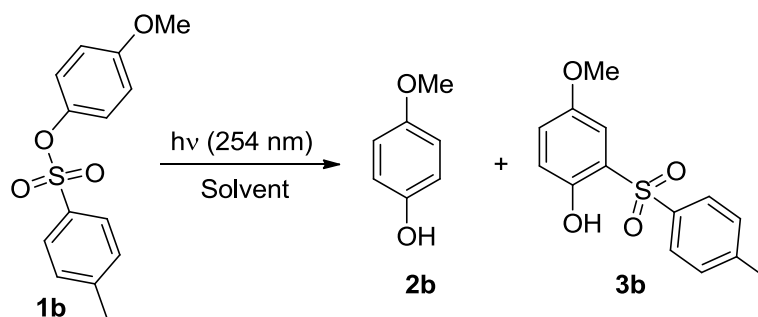

| Solvent                                                                                     | C-H BDE<br>(kcal mol <sup>-1</sup> ) <sup>b</sup> | E <sub>T</sub> <sup>N</sup> <sup>c</sup> | 2b (%) | 3b (%) |
|---------------------------------------------------------------------------------------------|---------------------------------------------------|------------------------------------------|--------|--------|
| Cyclohexane                                                                                 | 97.6                                              | 0.006                                    | 4      | 68     |
| CH <sub>2</sub> Cl <sub>2</sub> , Φ <sub>-1</sub> = 0.08 <sup>d</sup>                       | 97.3 ± 1.0                                        | 0.309                                    | 12     | 33     |
| CH <sub>3</sub> COOCH <sub>2</sub> CH <sub>3</sub>                                          | 95.4                                              | 0.228                                    | 26     | 36     |
| THF                                                                                         | 92 ± 1                                            | 0.207                                    | 39     | 24     |
| CH <sub>3</sub> CN, Φ <sub>-1</sub> = 0.13 <sup>d</sup>                                     | 96                                                | 0.460                                    | 24     | 30     |
| CH <sub>3</sub> OCH <sub>2</sub> CH <sub>2</sub> OH,<br>Φ <sub>-1</sub> = 0.07 <sup>d</sup> | -                                                 | 0.657                                    | 34     | 29     |
| CH <sub>3</sub> OH, Φ <sub>-1</sub> = 0.14 <sup>d</sup>                                     | 95.9 ± 1.5                                        | 0.762                                    | 41     | 28     |

<sup>a</sup> A nitrogen saturated solution of **1b** (10<sup>-2</sup> M) in the chosen solvent irradiated at 254 nm (4×15 W Hg lamps) until a >80% consumption of **1b** was achieved (2h). Product yields calculated on the basis of the amount of **1b** consumed. <sup>b</sup> from Luo, Y-R.; Handbook of Bond Dissociation Energies in Organic Compounds, CRC Press, Boca Raton, Florida, 2003. <sup>c</sup> Relative polarity, from Christian Reichardt, Solvents and Solvent Effects in Organic Chemistry, Wiley-VCH Publishers, 3rd ed., 2003. <sup>d</sup> Disappearance quantum yield (Φ<sub>-1</sub>) measured on a 10<sup>-2</sup> M **1b** solution in the chosen solvent (λ = 254 nm, 1×15W Hg lamp) by using potassium ferrioxalate as actinometer.

## UV-vis spectra of compounds 1a-g.

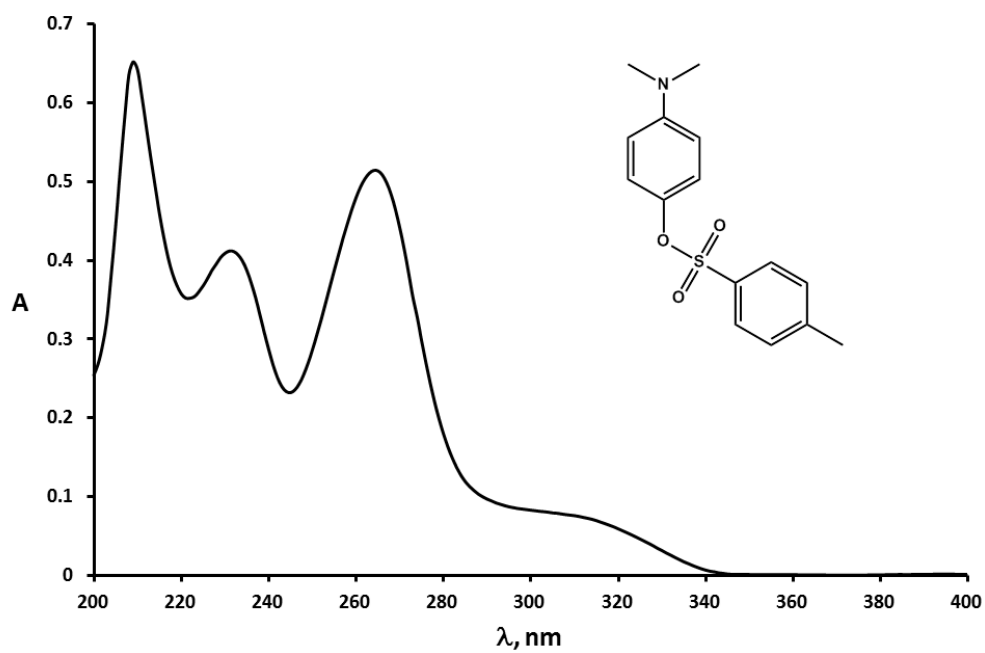

**Figure S1.** UV-vis spectrum of **1a** ( $5 \times 10^{-5}$  M) in MeOH.

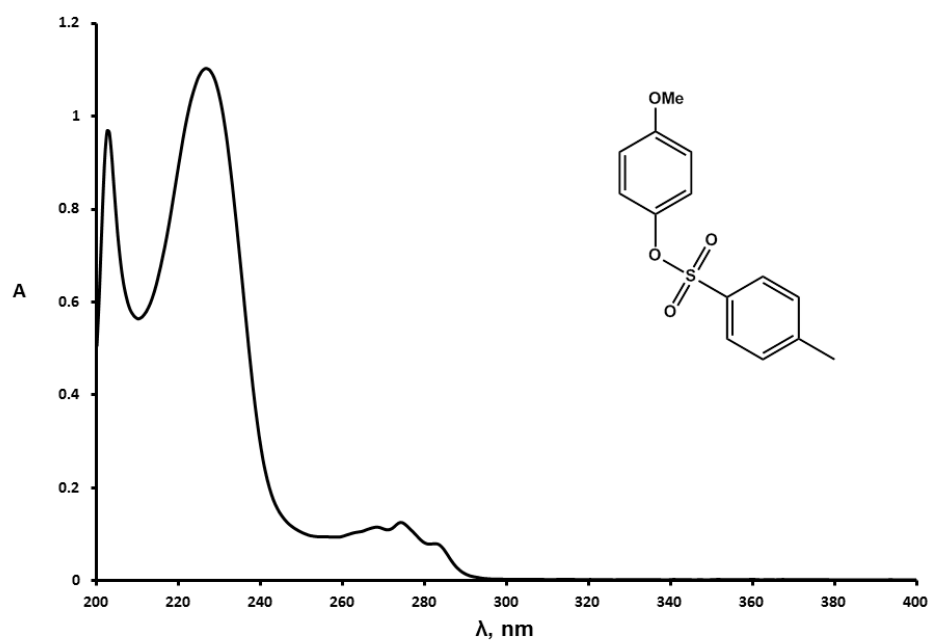

**Figure S2.** UV-vis spectrum of **1b** ( $5.2 \times 10^{-5}$  M) in MeOH.

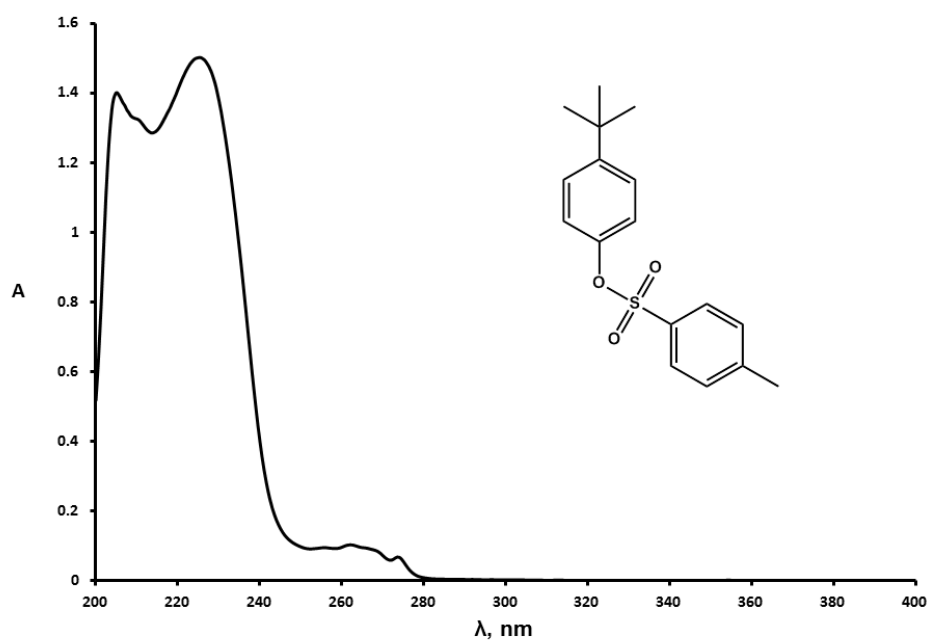

**Figure S3.** UV-vis spectrum of **1c** ( $5 \times 10^{-5}$  M) in MeOH.

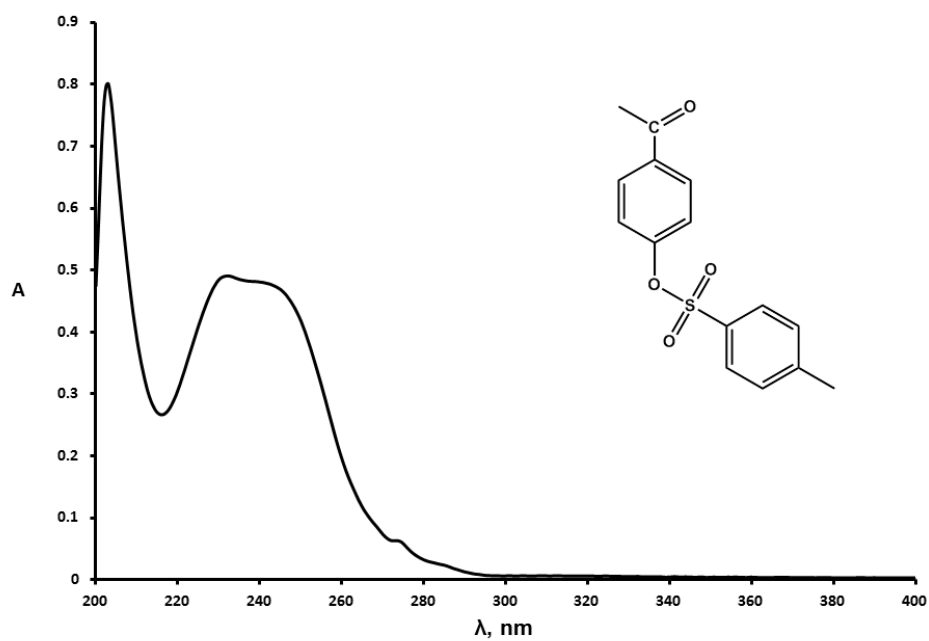

**Figure S4.** UV-vis spectrum of **1d** ( $1.25 \times 10^{-5}$  M) in MeOH

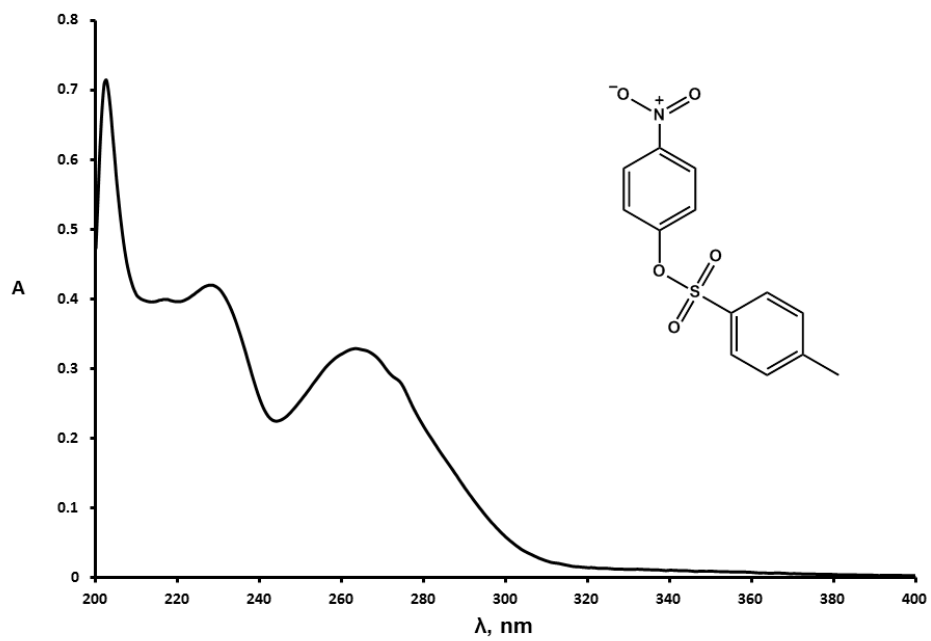

**Figure S5** UV-vis spectrum of **1e** ( $1.25 \times 10^{-5}$  M) in MeOH.

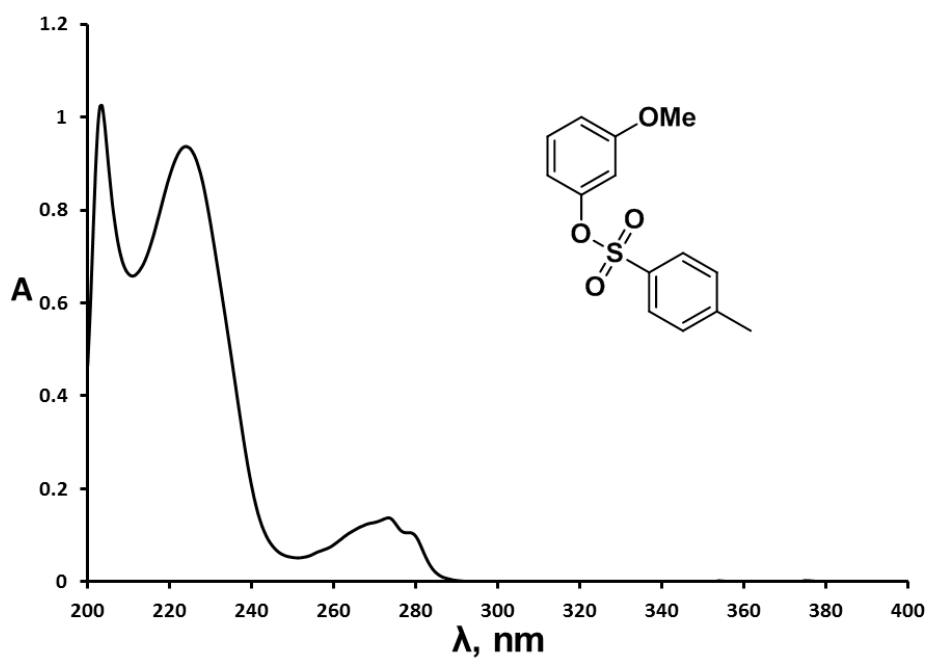

**Figure S6** UV-vis spectrum of **1f** ( $2.5 \times 10^{-5}$  M) in MeOH.

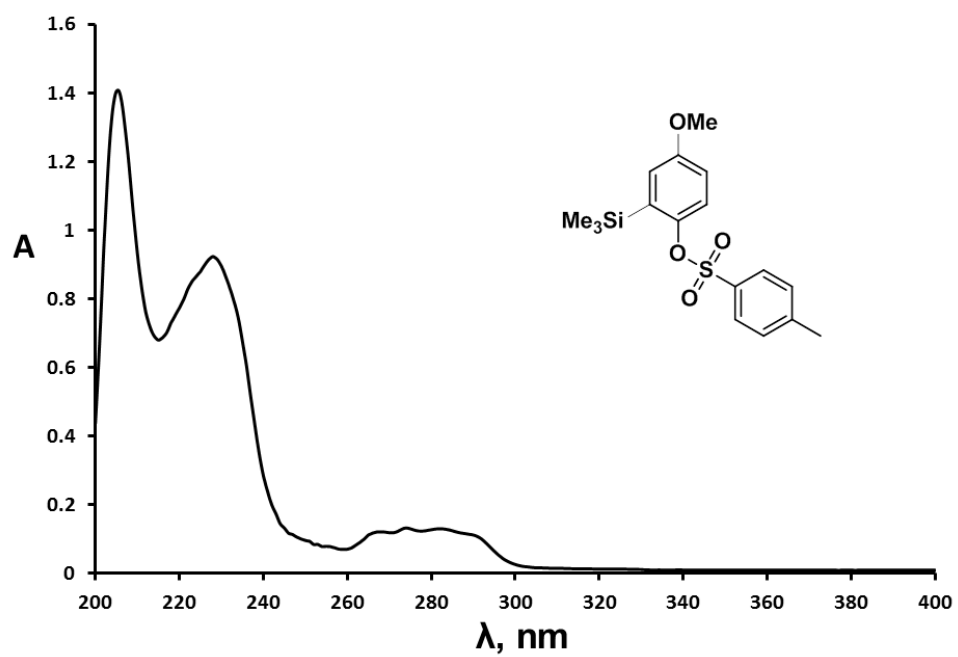

**Figure S7** UV-vis spectrum of **1g** ( $3.2 \times 10^{-5}$  M) in MeOH.

**2. Potentiometric titrations of a  $10^{-2}$  M solution of compounds 1a-d, 1f-g after irradiation ( $t_{\text{irr}} = 2$  h) in MeOH.**

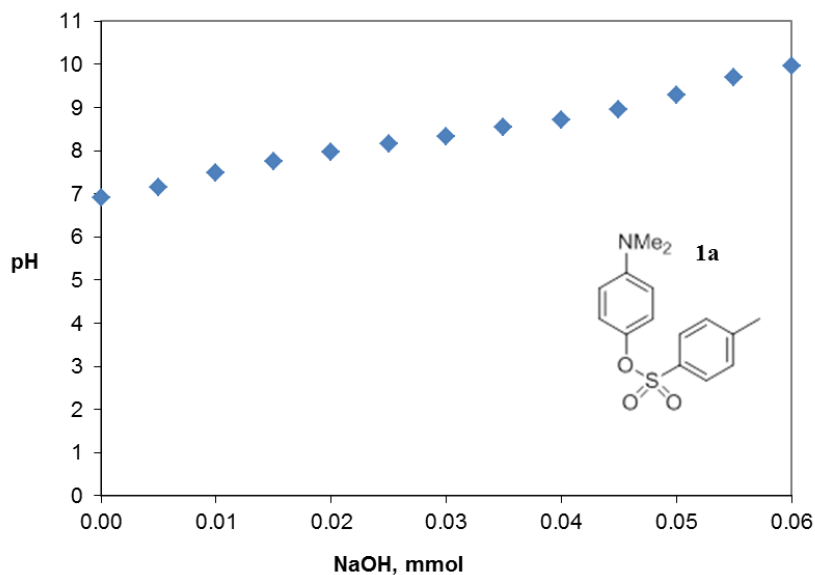

**Figure S8** Potentiometric titration of a  $10^{-2}$  M solution of **1a** after irradiation in  $\text{N}_2$ -saturated MeOH.

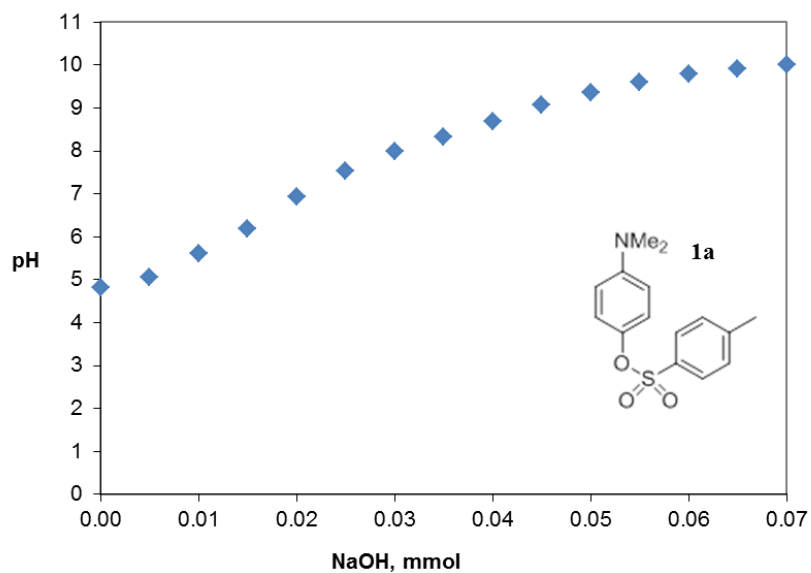

**Figure S9** Potentiometric titration of a  $10^{-2}$  M solution of **1a** after irradiation in  $\text{O}_2$ -saturated MeOH.



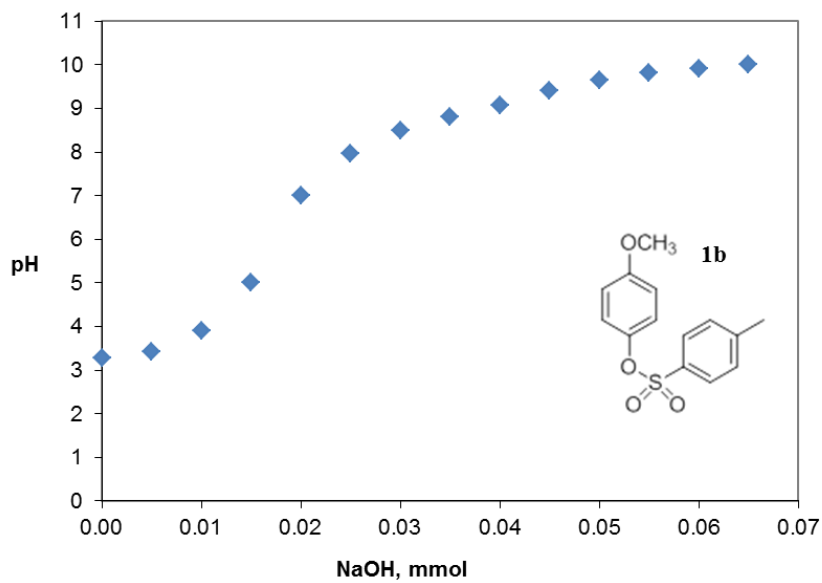

**Figure S10** Potentiometric titration of a  $10^{-2}$  M solution of **1b** after irradiation in  $N_2$ -saturated MeOH.

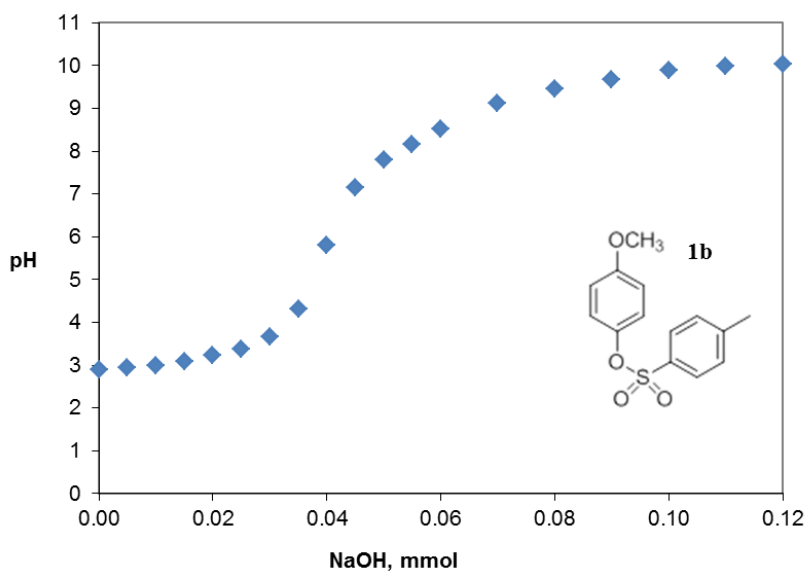

**Figure S11** Potentiometric titration of a  $10^{-2}$  M solution of **1b** after irradiation in  $O_2$ -saturated MeOH.

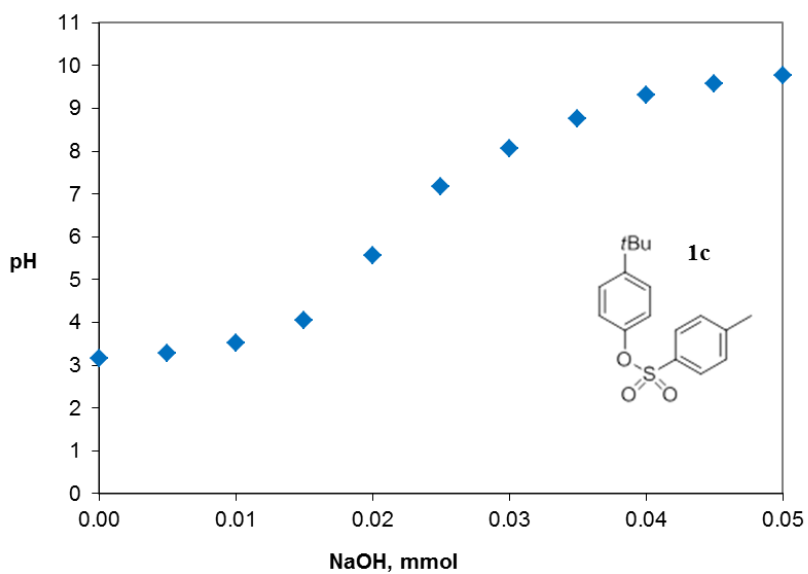

**Figure S12** Potentiometric titration of a  $10^{-2}$  M solution of **1c** after irradiation in  $N_2$ -saturated MeOH.

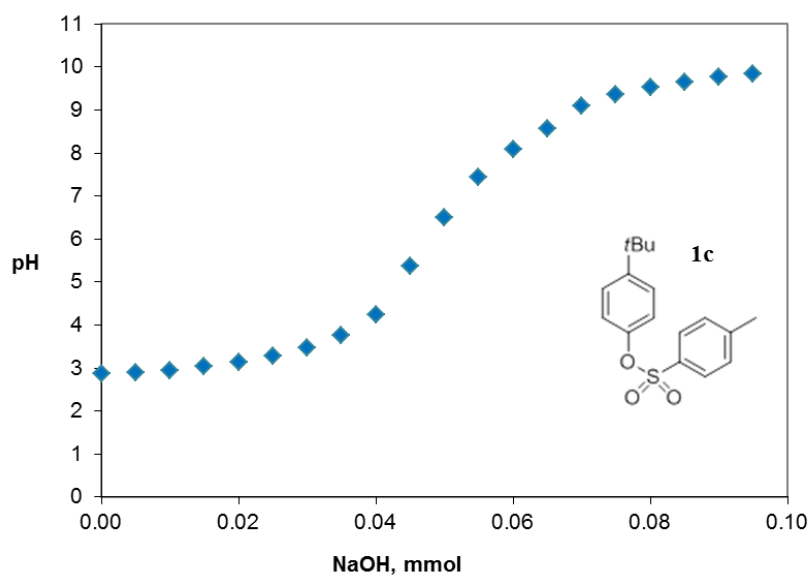

**Figure S13** Potentiometric titration of a  $10^{-2}$  M solution of **1c** after irradiation in  $O_2$ -saturated MeOH.

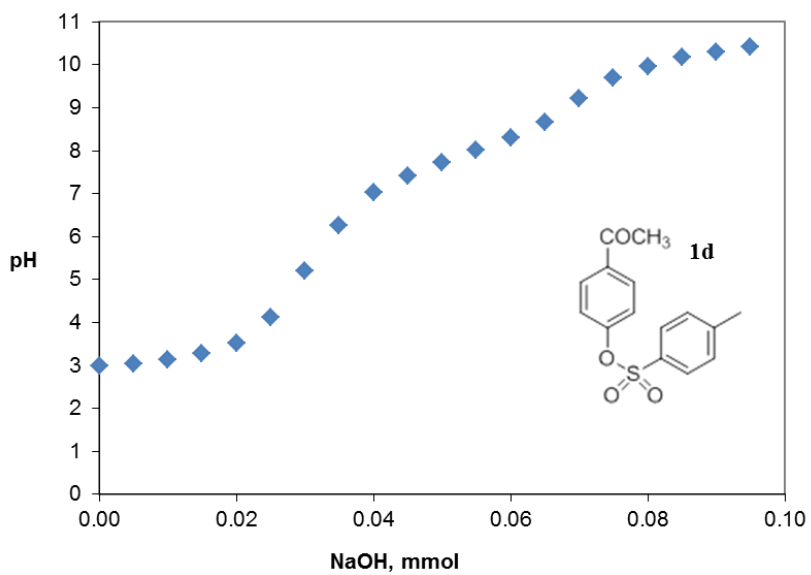

**Figure S14** Potentiometric titration of a  $10^{-2}$  M solution of **1d** after irradiation in  $N_2$ -saturated MeOH.

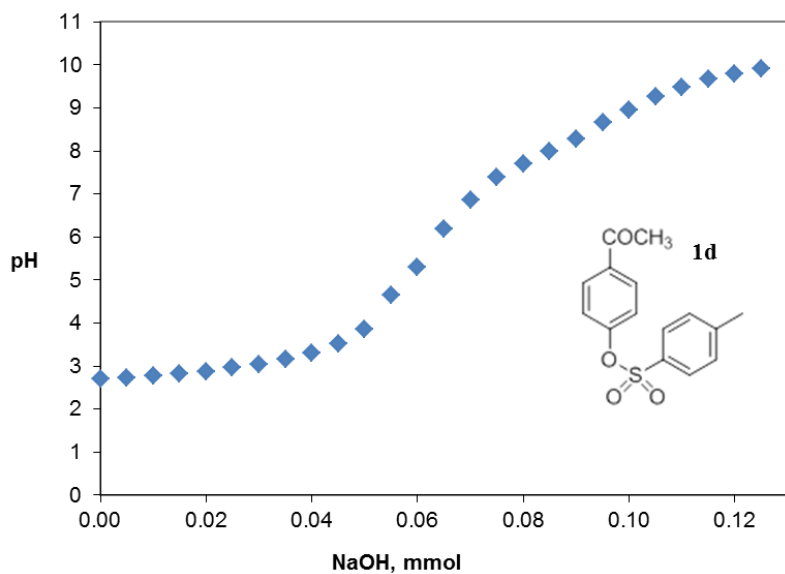

**Figure S15** Potentiometric titration of a  $10^{-2}$  M solution of **1d** after irradiation in  $O_2$ -saturated MeOH.

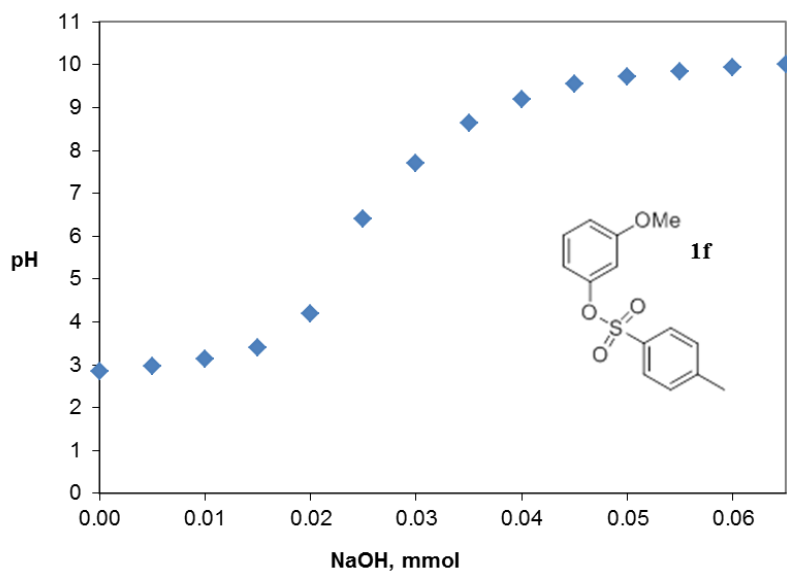

**Figure S16** Potentiometric titration of a  $10^{-2}$  M solution of **1f** after irradiation in  $N_2$ -saturated MeOH.

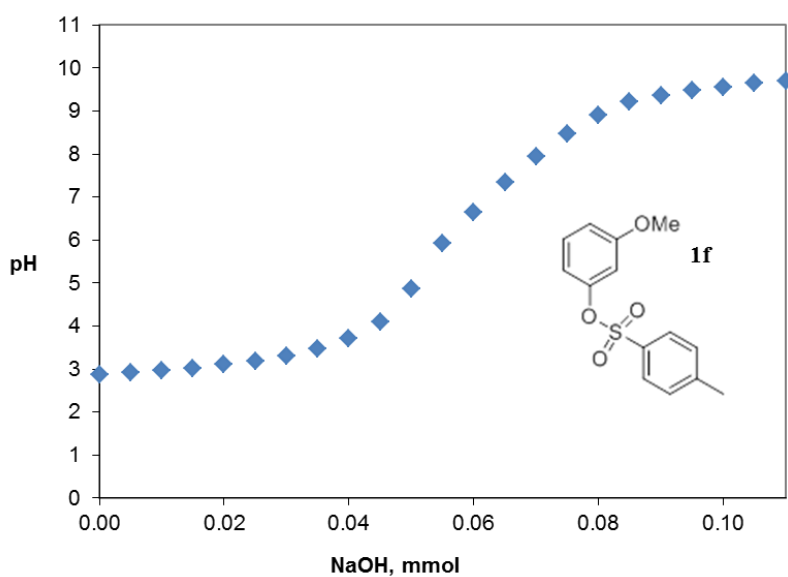

**Figure S17** Potentiometric titration of a  $10^{-2}$  M solution of **1f** after irradiation in  $O_2$ -saturated MeOH.

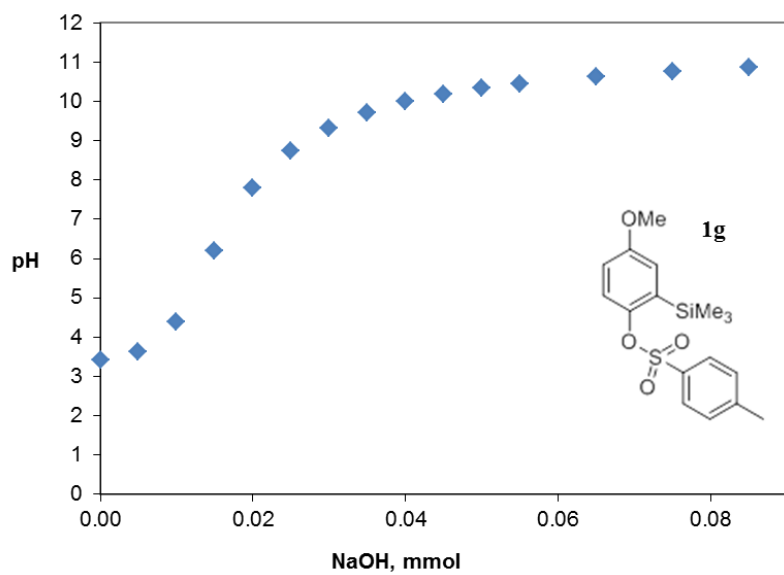

**Figure S18** Potentiometric titration of a  $10^{-2}$  M solution of **1g** after irradiation in  $N_2$ -saturated MeOH.

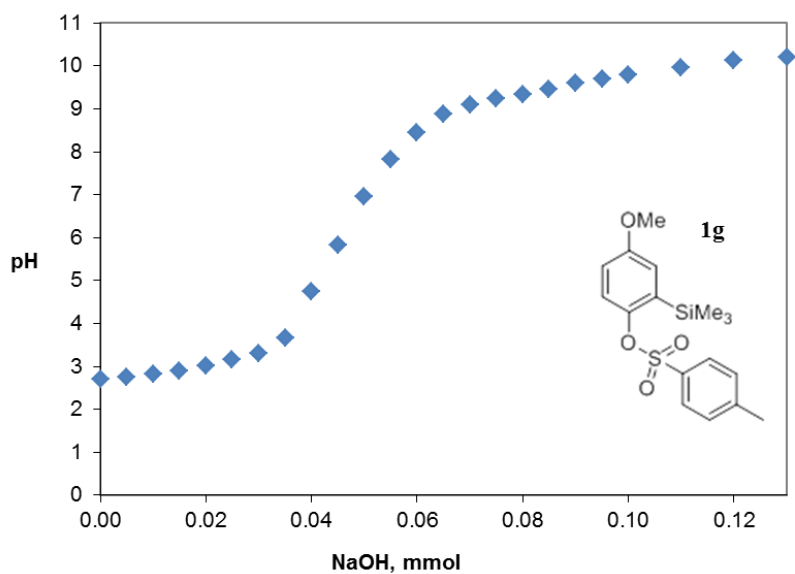

**Figure S19** Potentiometric titration of a  $10^{-2}$  M solution of **1g** after irradiation in  $O_2$ -saturated MeOH.

### 3. Irradiation and LFP experiments on 1b and 1d

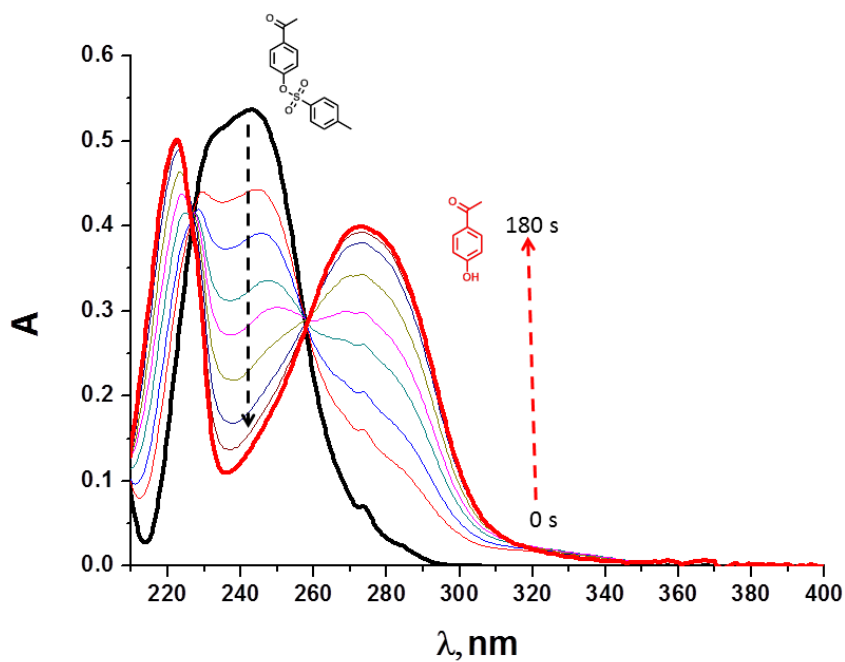

**Figure S20** Absorption spectra of **1d** ( $2.9 \times 10^{-5}$  M) in  $N_2$  saturated MeOH during irradiation ( $1 \times 15$  W Hg lamp,  $\lambda_{em} = 254$  nm).

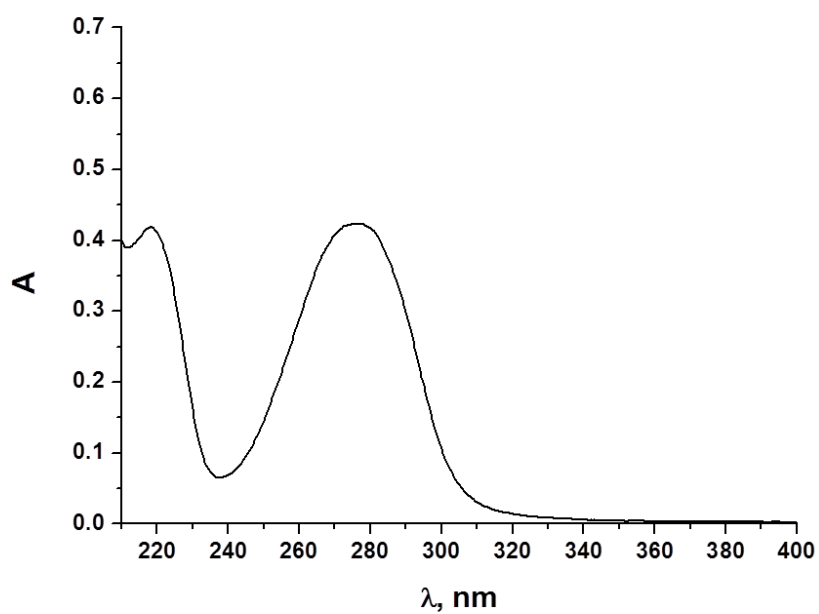

**Figure S21** UV-vis spectrum of **2d** ( $2.6 \times 10^{-5}$  M) in MeOH.

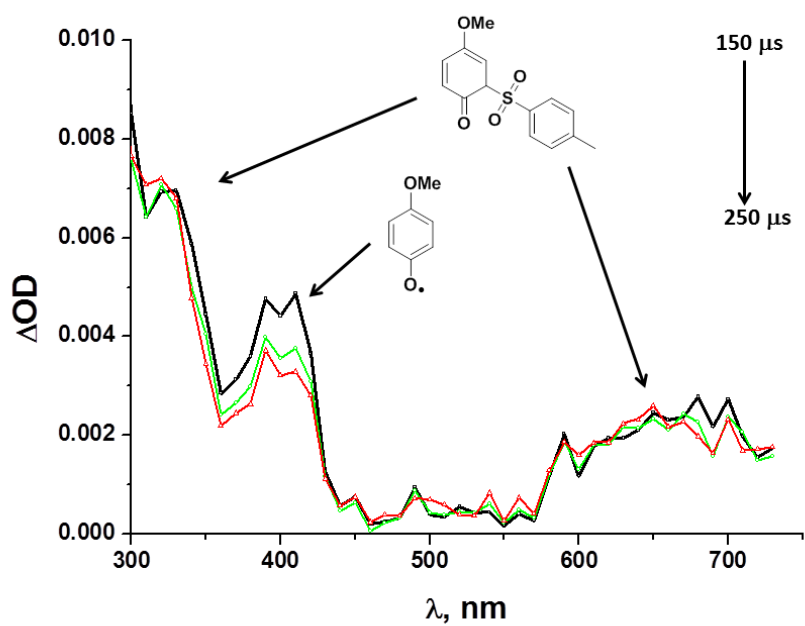

**Figure S22** Transient spectra of a solution of **1b** ( $10^{-4}$  M) in Argon saturated methanol recorded 150  $\mu s$  after a 20 ns laser pulse ( $\lambda = 266$  nm).

#### 4. $^1\text{H}$ and $^{13}\text{C}$ spectra of compounds 1a-g and 3a, 3b, 3g.

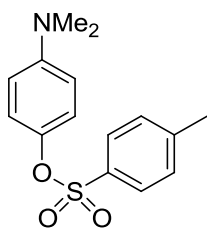

**1a**,  $^1\text{H}$  NMR ( $\delta$ ,  $\text{CDCl}_3$ ).

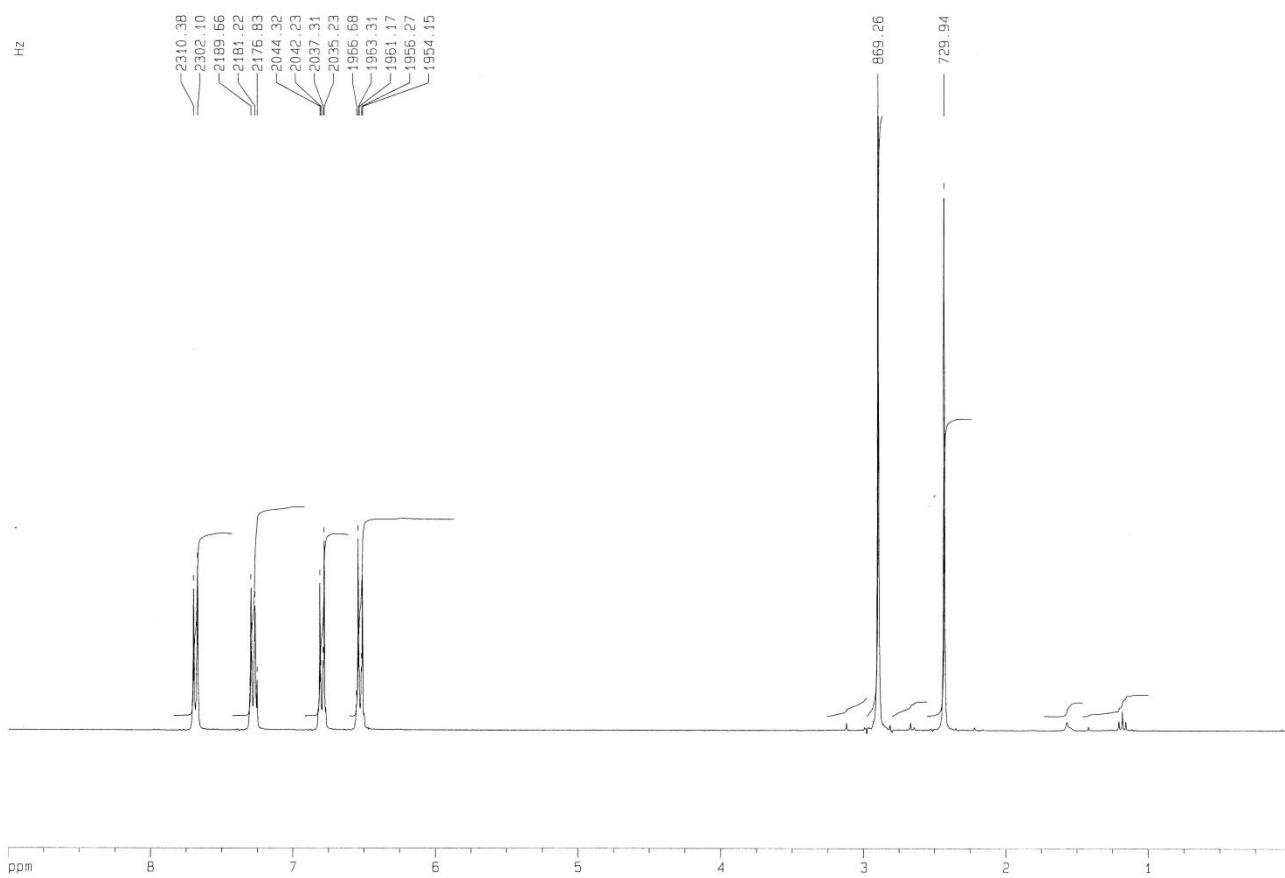



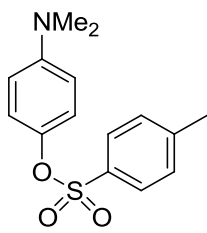

**1a**, <sup>13</sup>C NMR (δ, CDCl<sub>3</sub>).

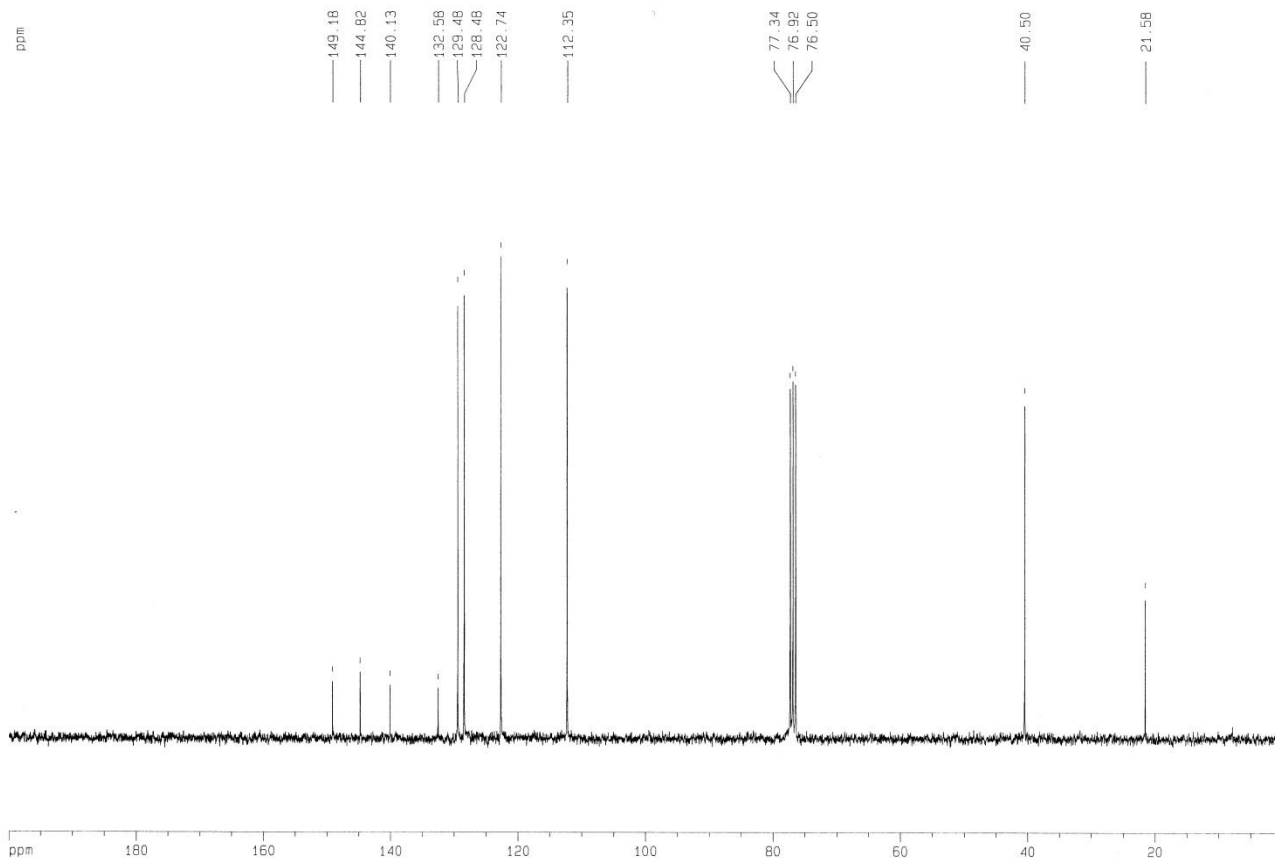

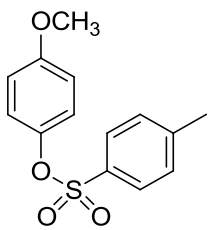

**1b**,  $^1\text{H NMR}$  ( $\delta$ ,  $\text{CDCl}_3$ ).

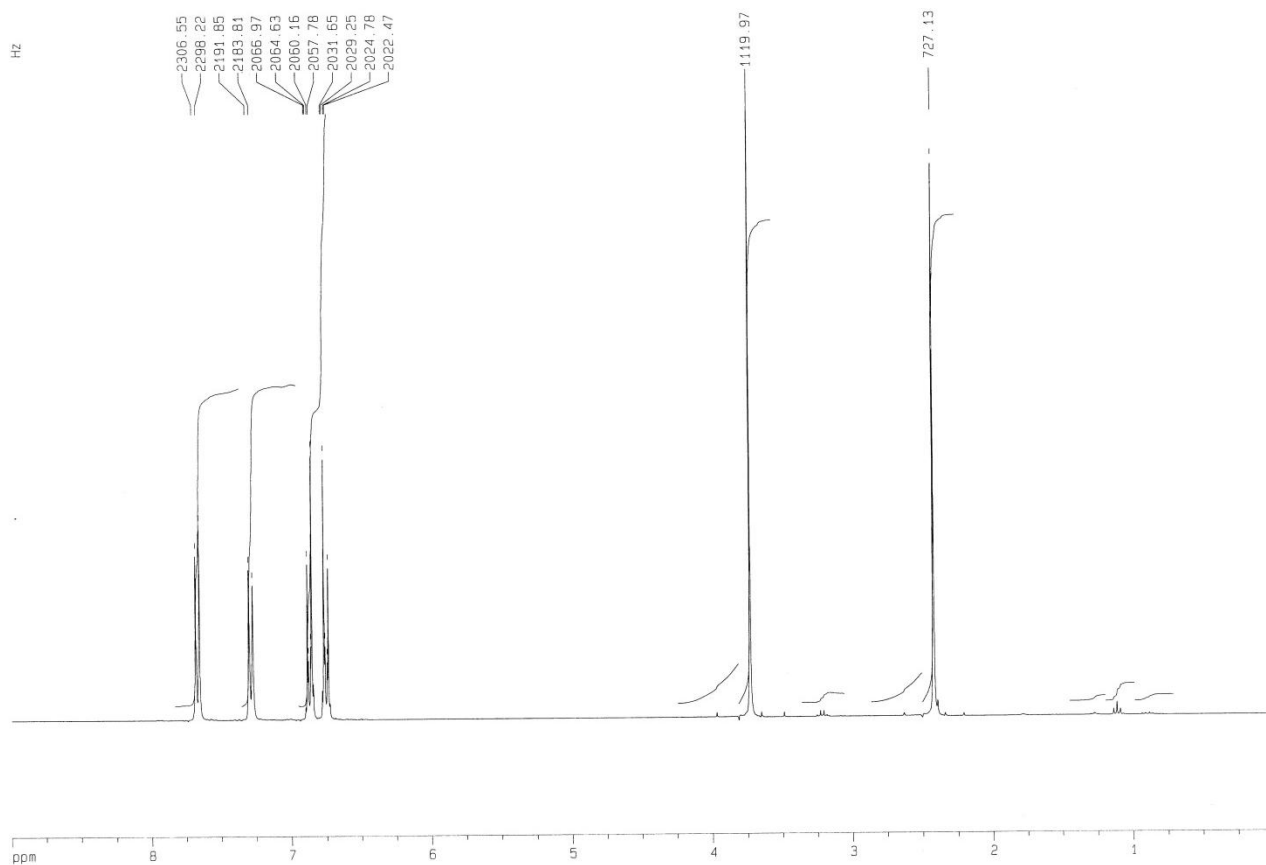

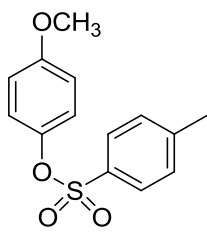

**1b**,  $^{13}\text{C}$  NMR ( $\delta$ ,  $\text{CDCl}_3$ ).

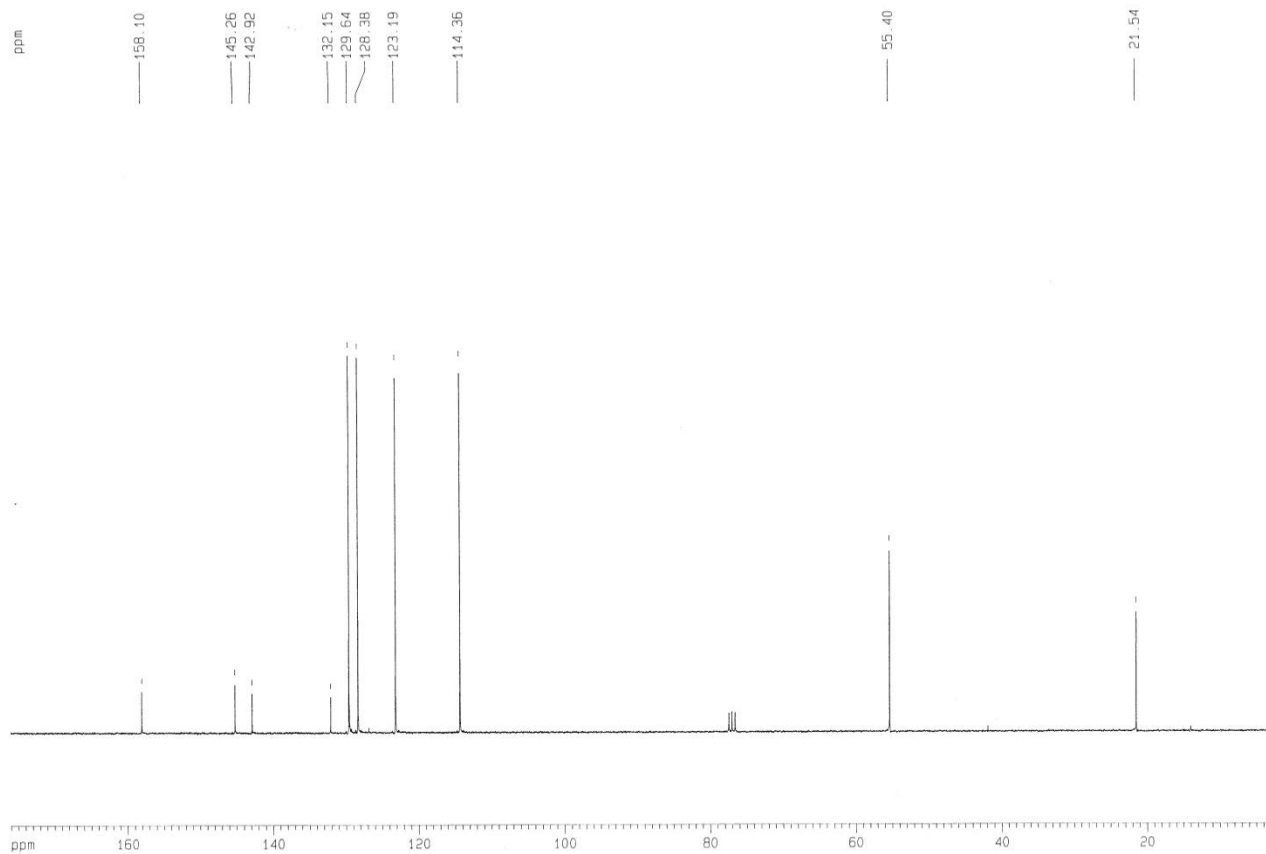

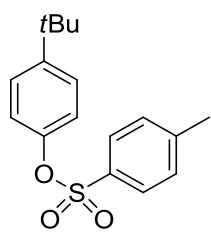

**1c**, <sup>1</sup>H NMR (δ, CDCl<sub>3</sub>).

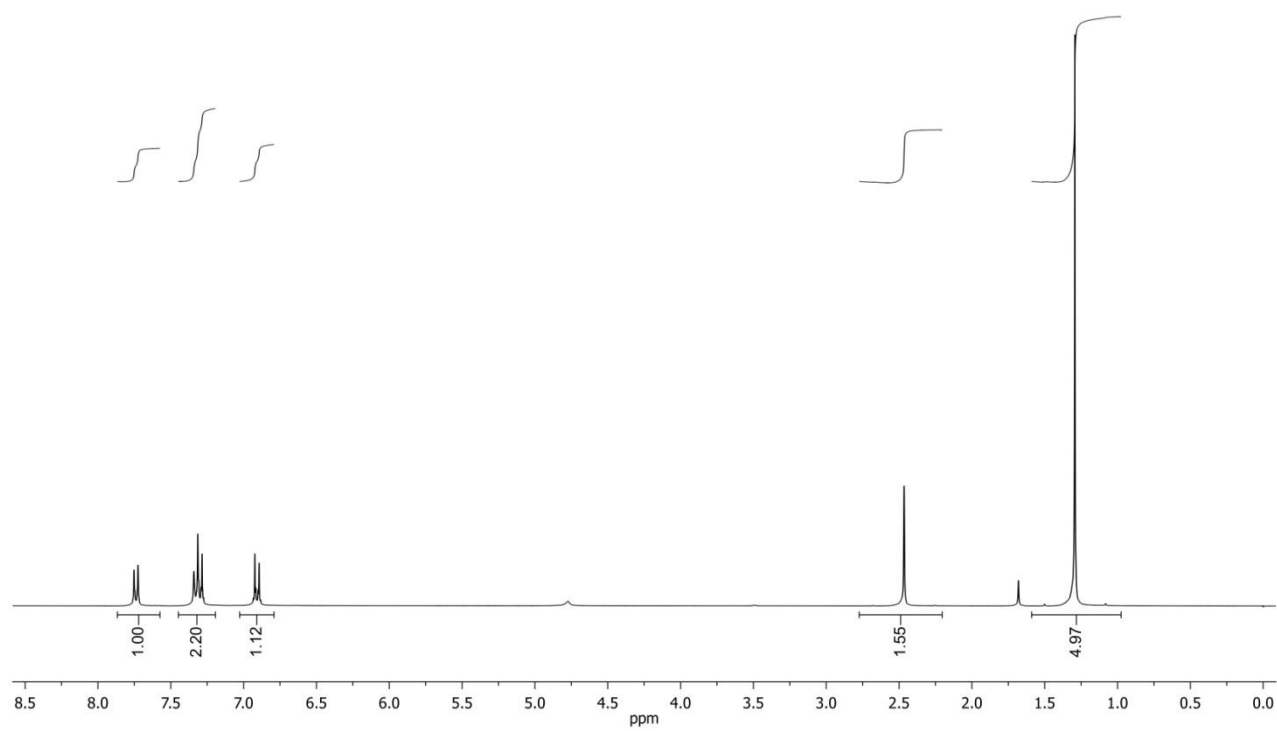

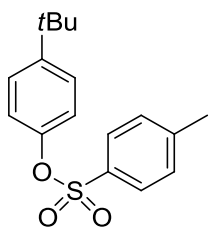

**1c**,  $^{13}\text{C}$  NMR ( $\delta$ ,  $\text{CDCl}_3$ ).

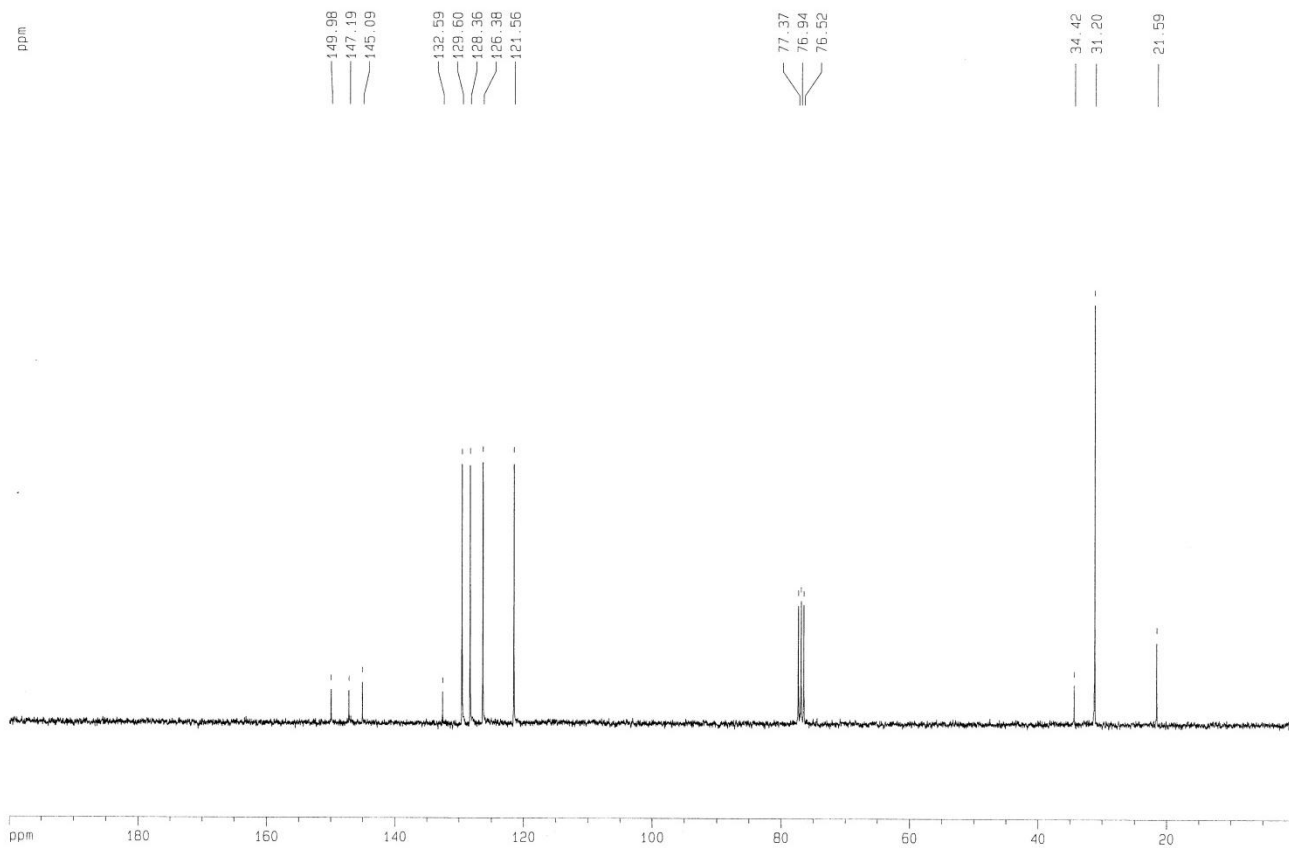

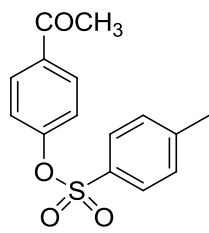

**1d**,  $^1\text{H}$  NMR ( $\delta$ ,  $\text{CDCl}_3$ ).

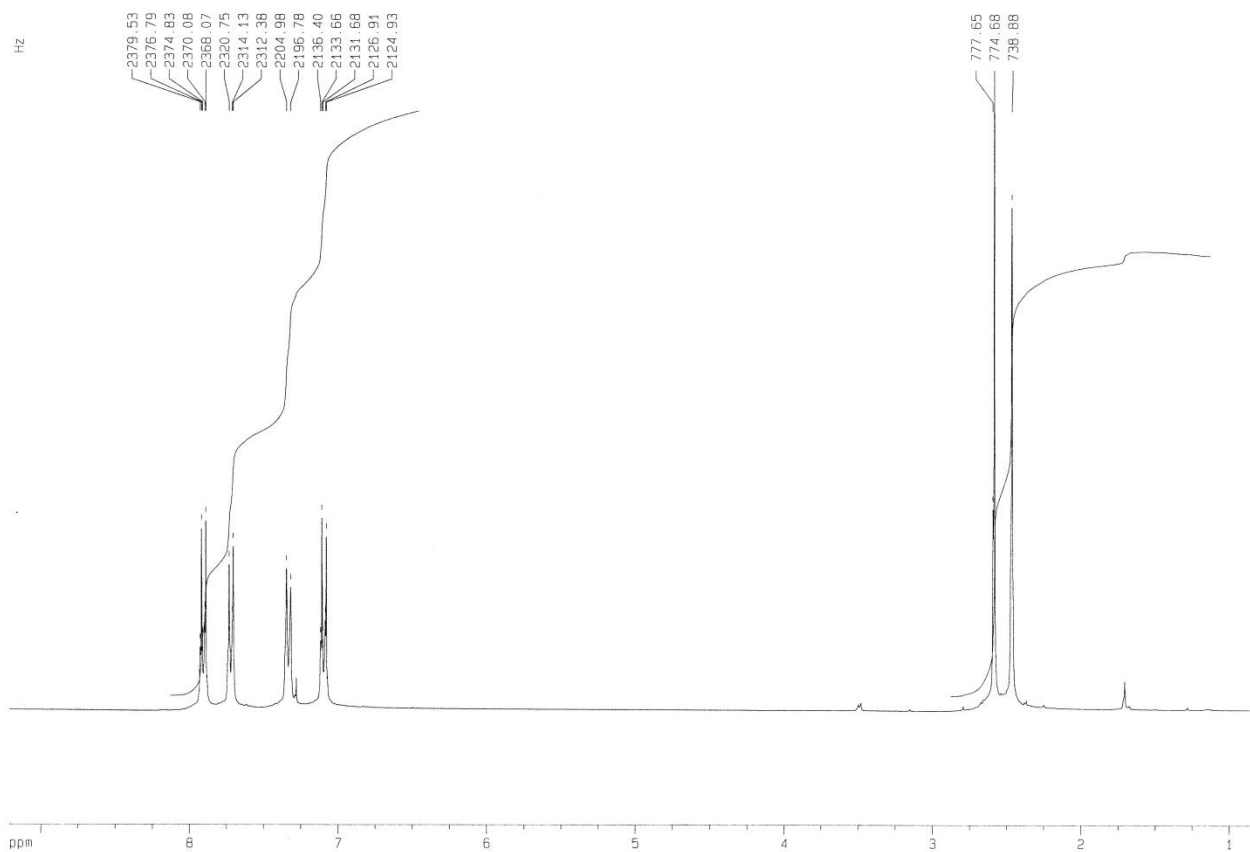

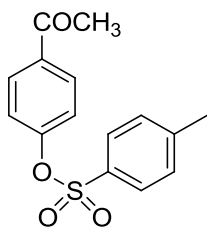

**1d**,  $^{13}\text{C}$  NMR ( $\delta$ ,  $\text{CDCl}_3$ ).

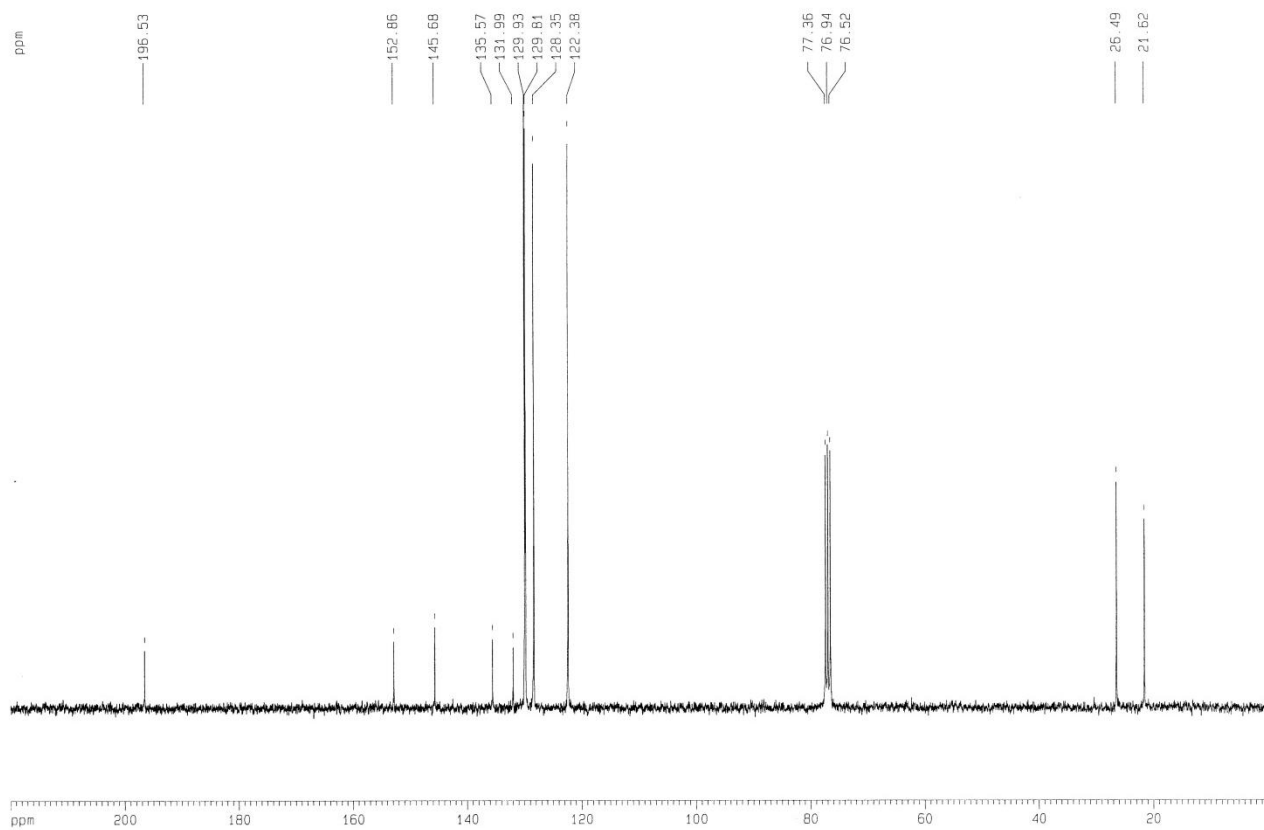

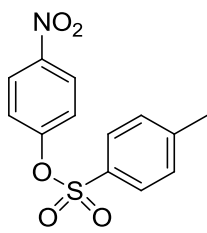

**1e**,  $^1\text{H NMR}$  ( $\delta$ ,  $\text{CDCl}_3$ ).

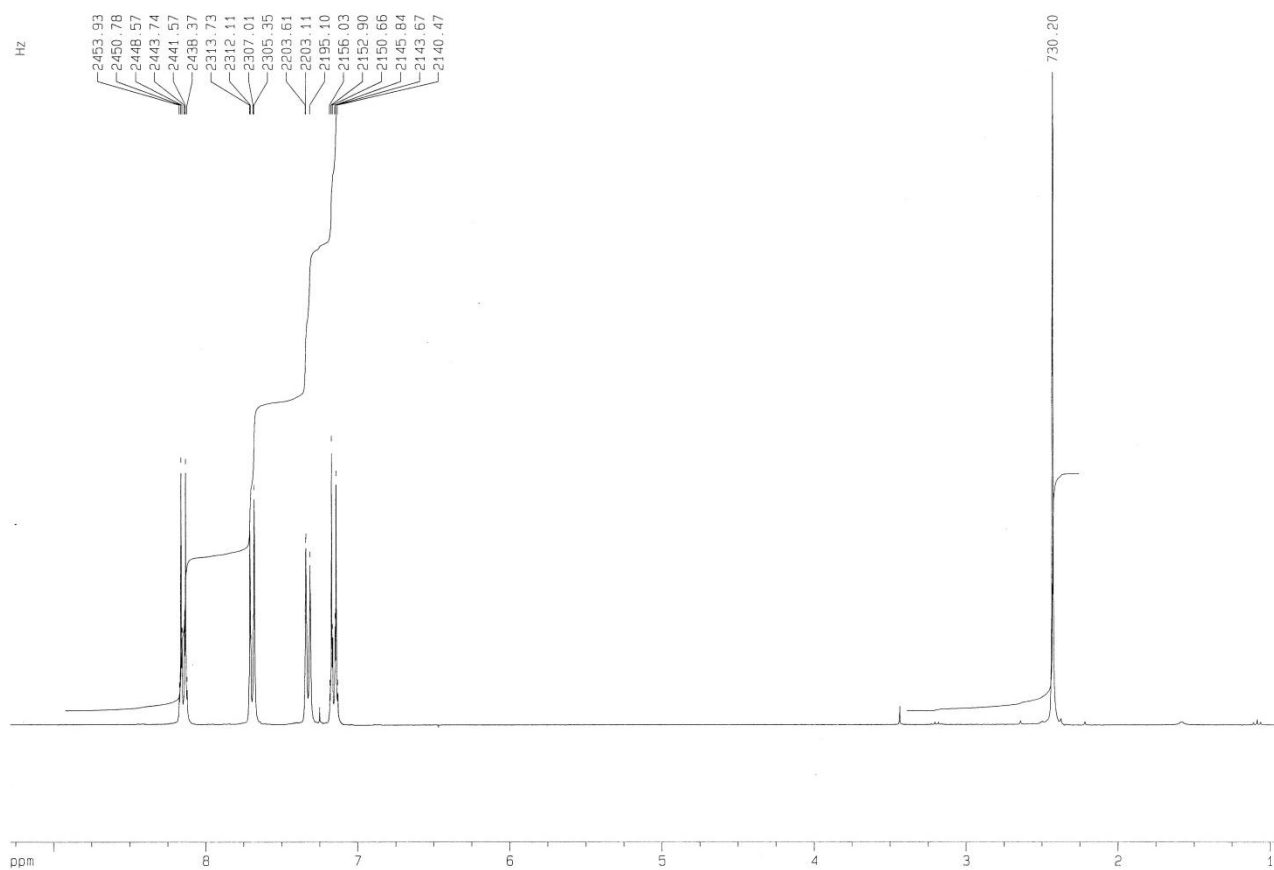



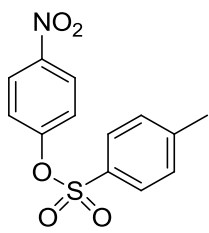

**1e**, <sup>13</sup>C NMR (δ, CDCl<sub>3</sub>).

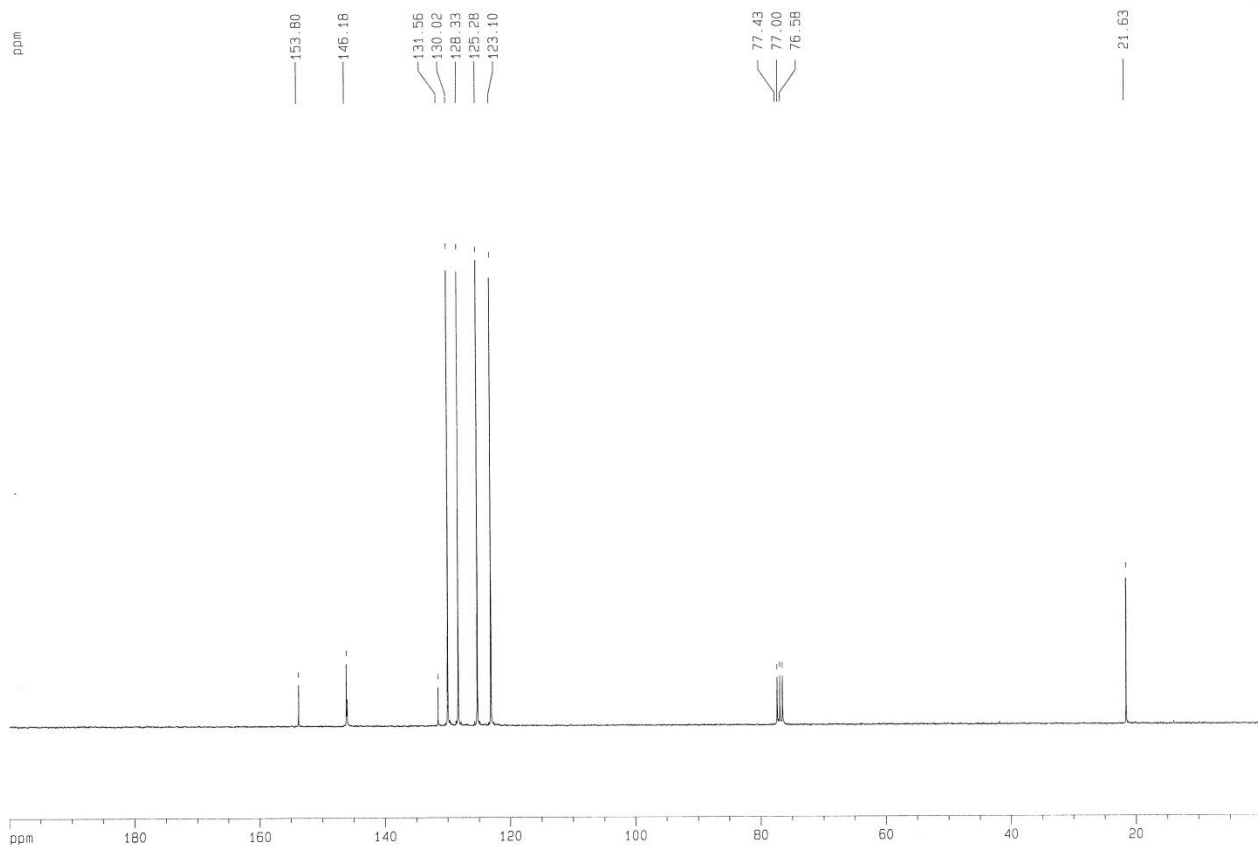

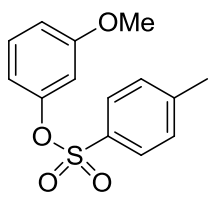

**1f**,  $^1\text{H}$  NMR ( $\delta$ ,  $\text{CDCl}_3$ ).

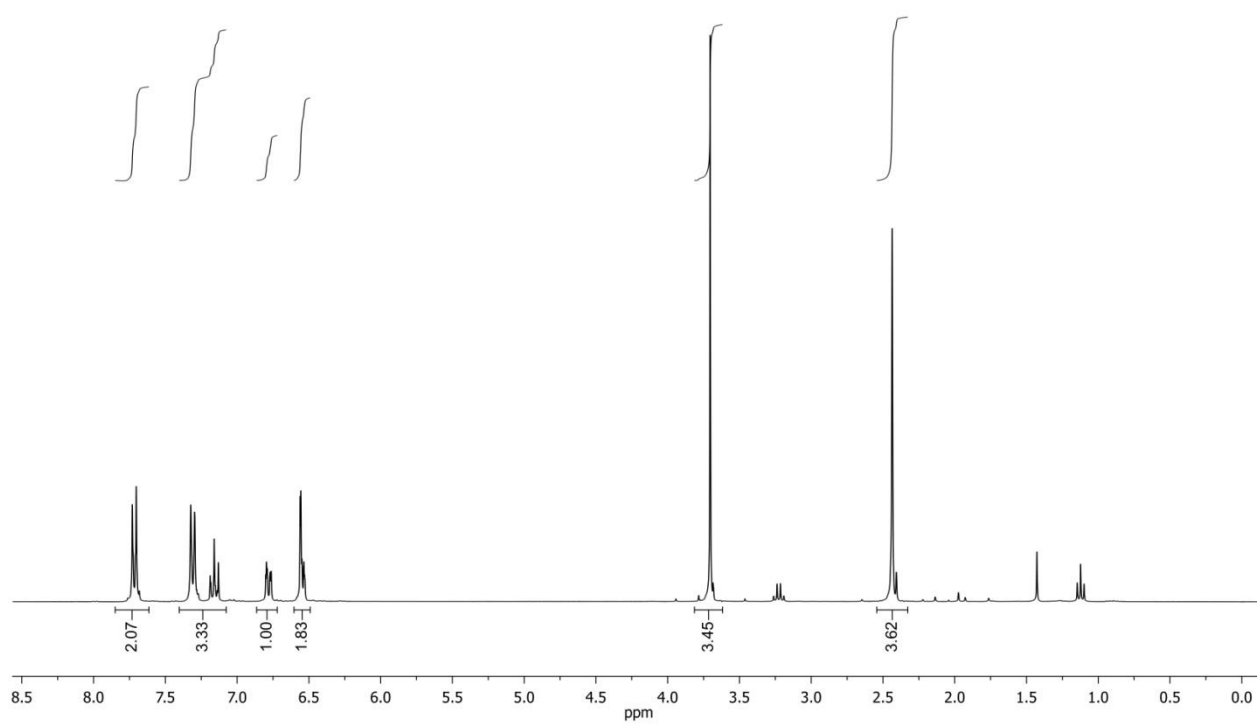

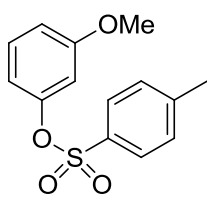

**1f**,  $^{13}\text{C}$  NMR ( $\delta$ ,  $\text{CDCl}_3$ ).

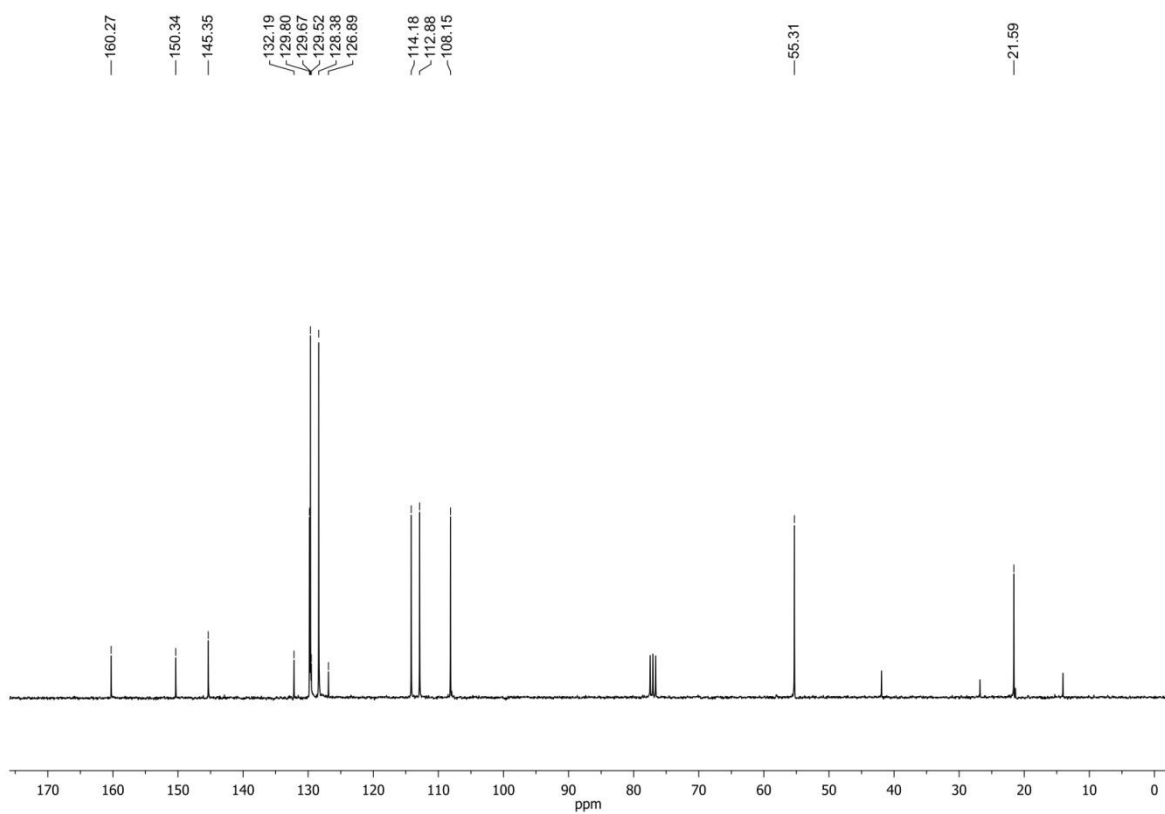

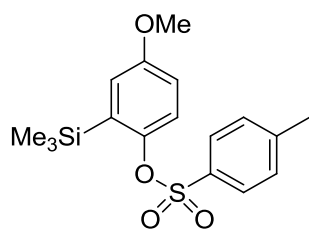

**1g**, <sup>1</sup>H NMR (δ, CDCl<sub>3</sub>).

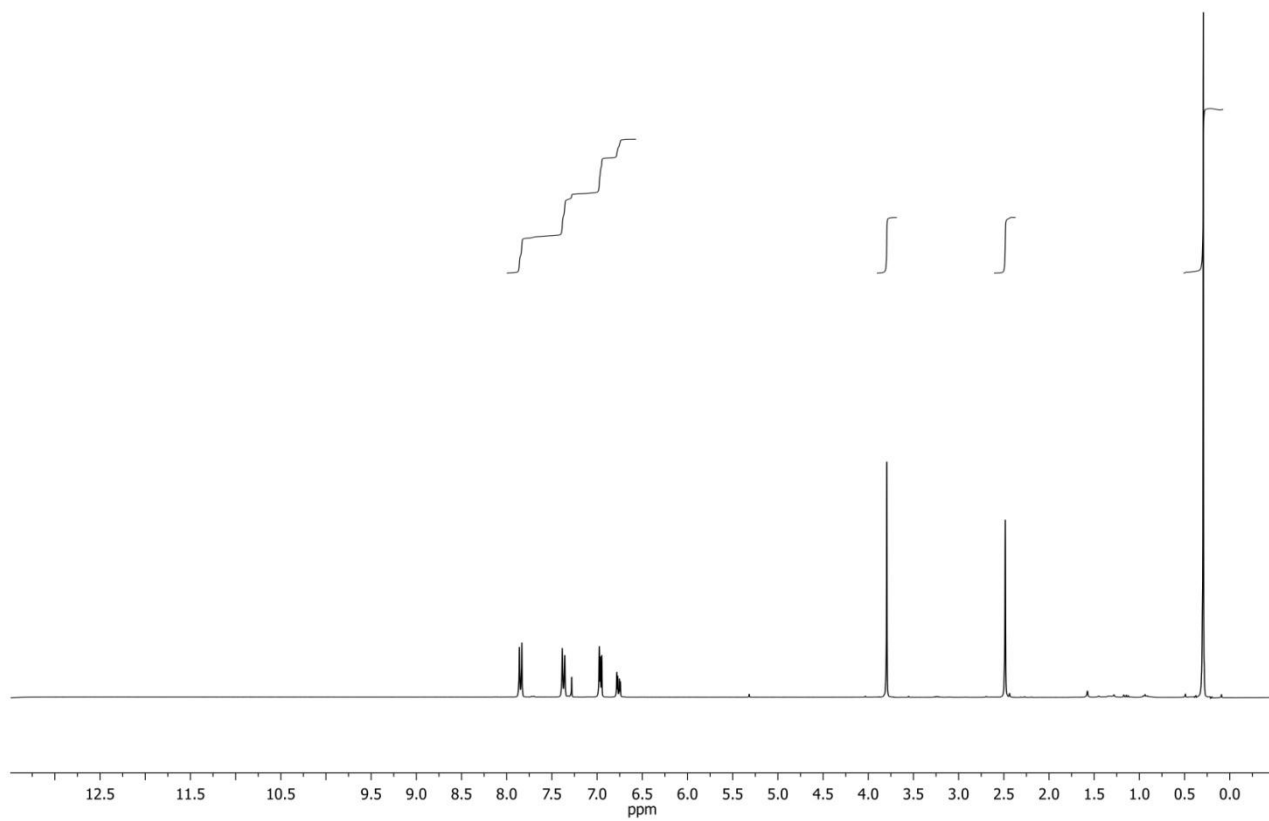



**1g**,  $^{13}\text{C}$  NMR ( $\delta$ ,  $\text{CDCl}_3$ ).

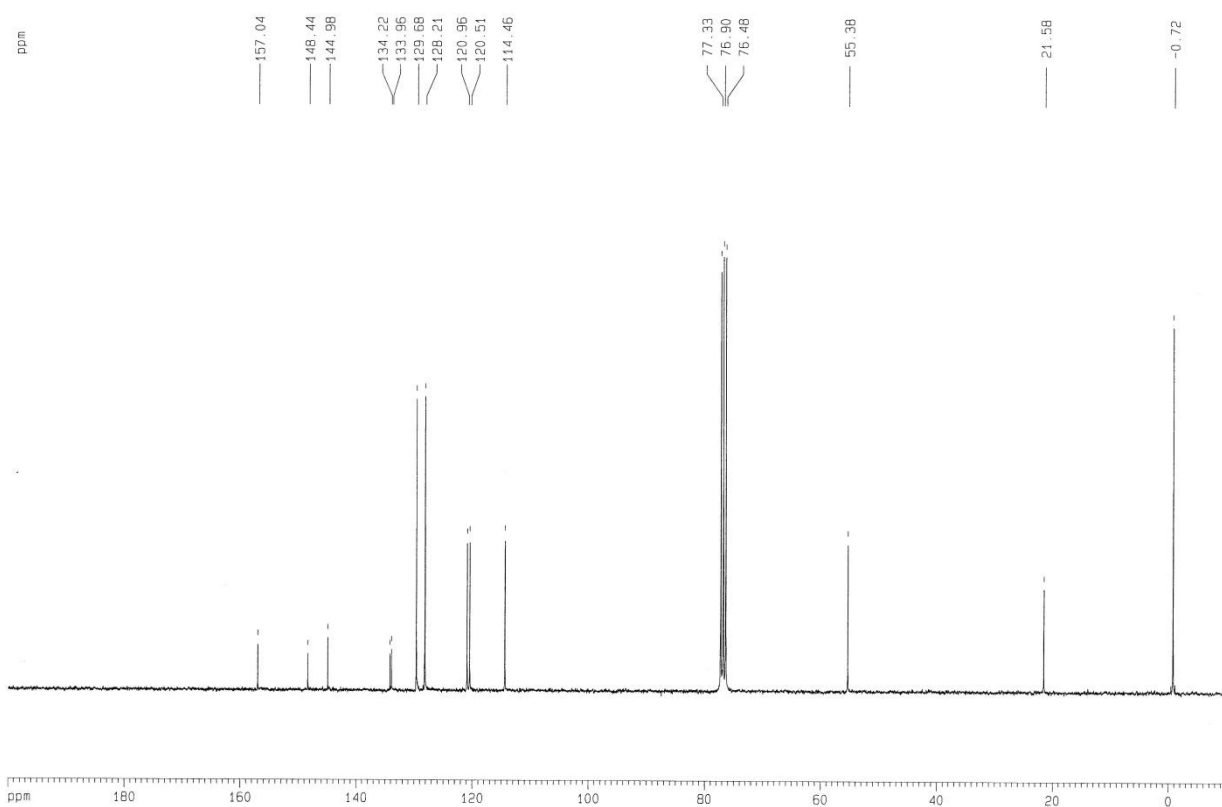

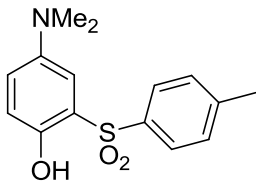

**3a**,  $^1\text{H NMR}$  ( $\delta$ ,  $\text{CDCl}_3$ ).

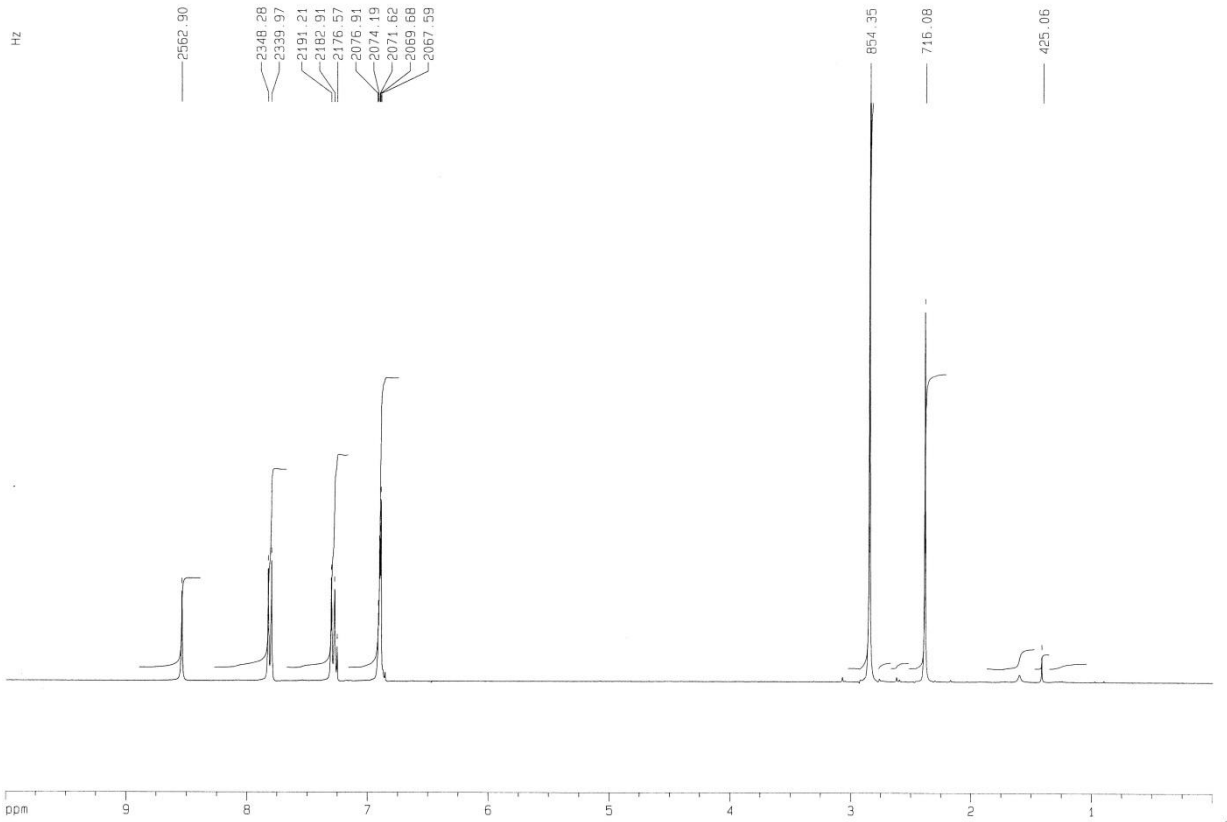

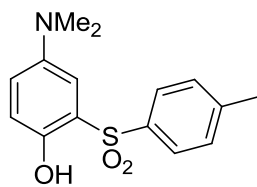

**3a**,  $^{13}\text{C}$  NMR ( $\delta$ ,  $\text{CDCl}_3$ ).

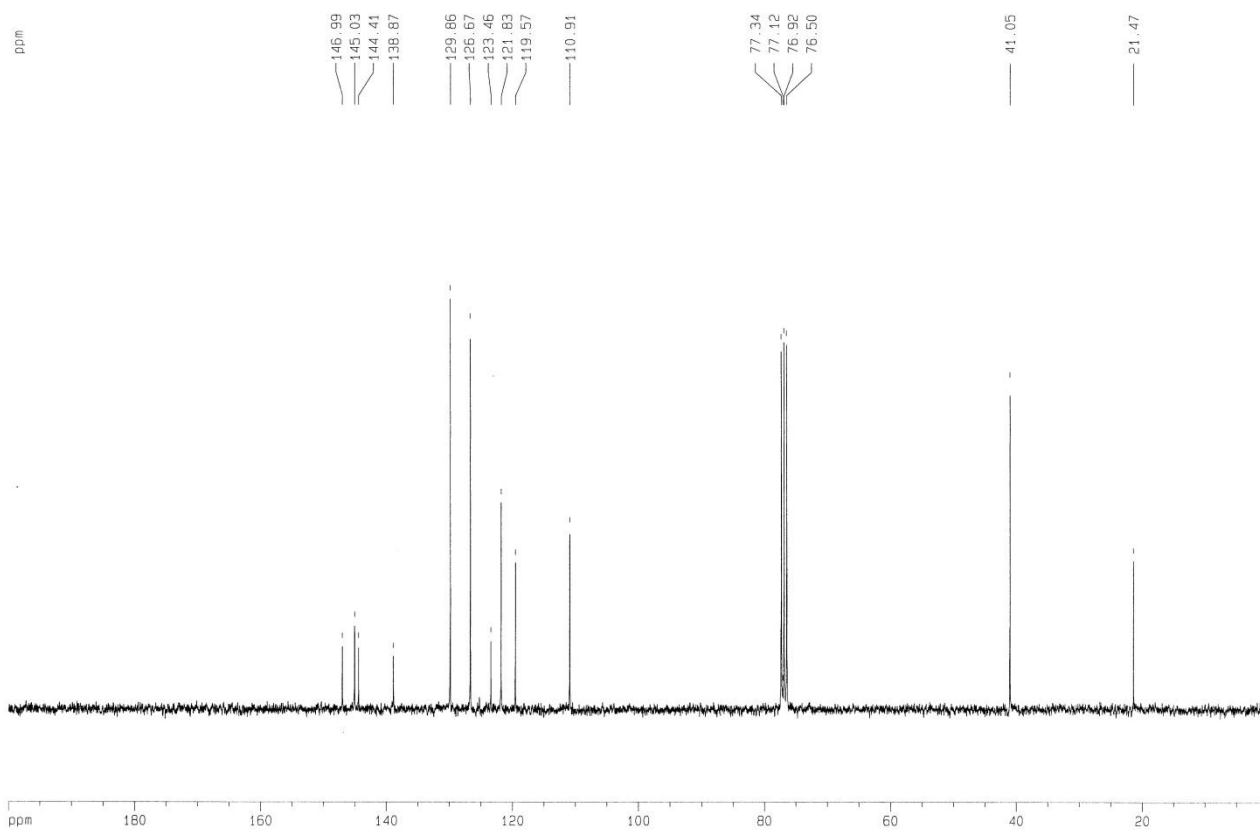

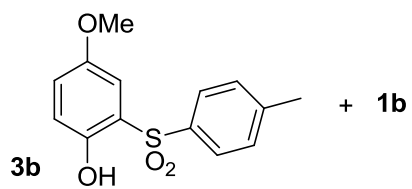

**3b**,  $^1\text{H}$  NMR of the mixture ( $\delta$ ,  $\text{CDCl}_3$ ).

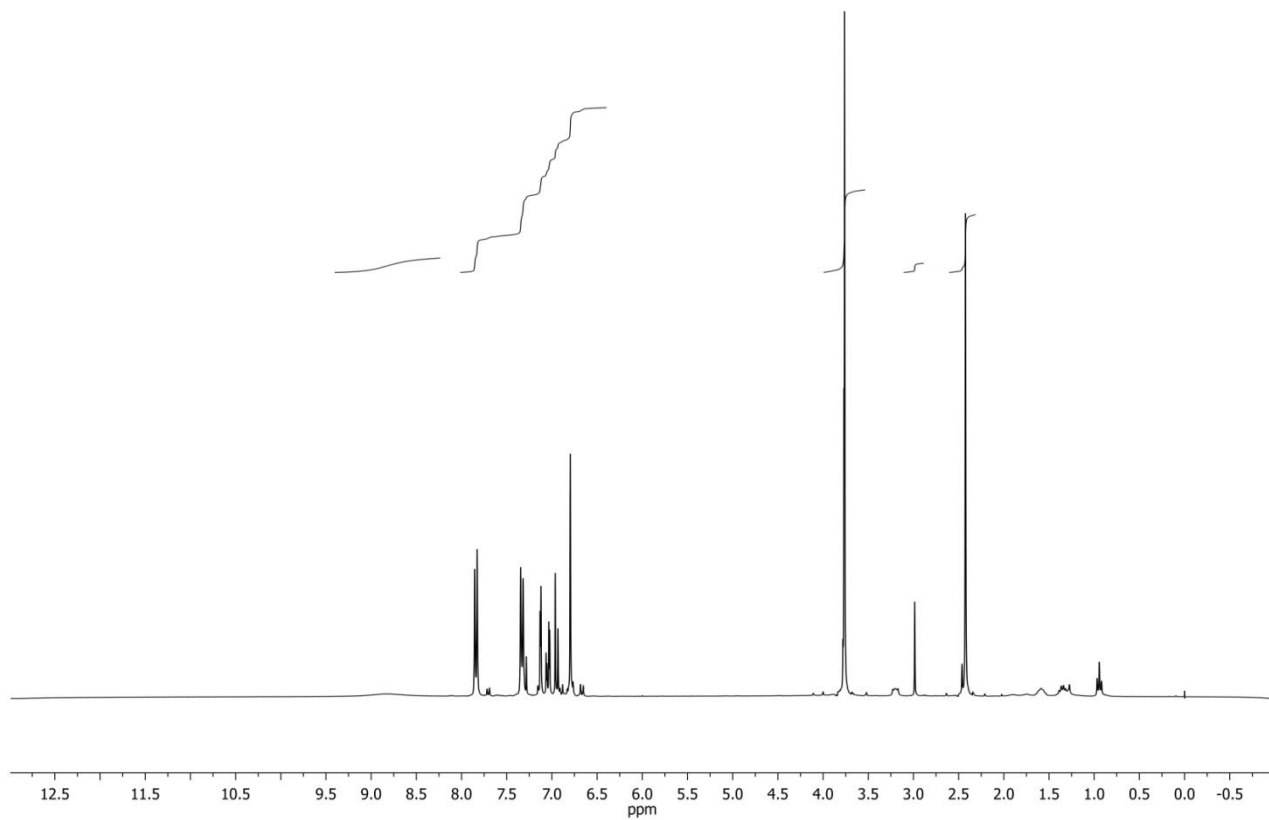



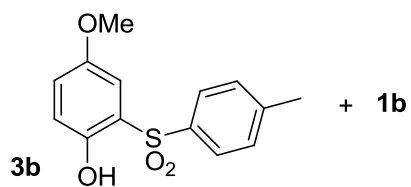

**3b**,  $^{13}\text{C}$  NMR of the mixture ( $\delta$ ,  $\text{CDCl}_3$ ).

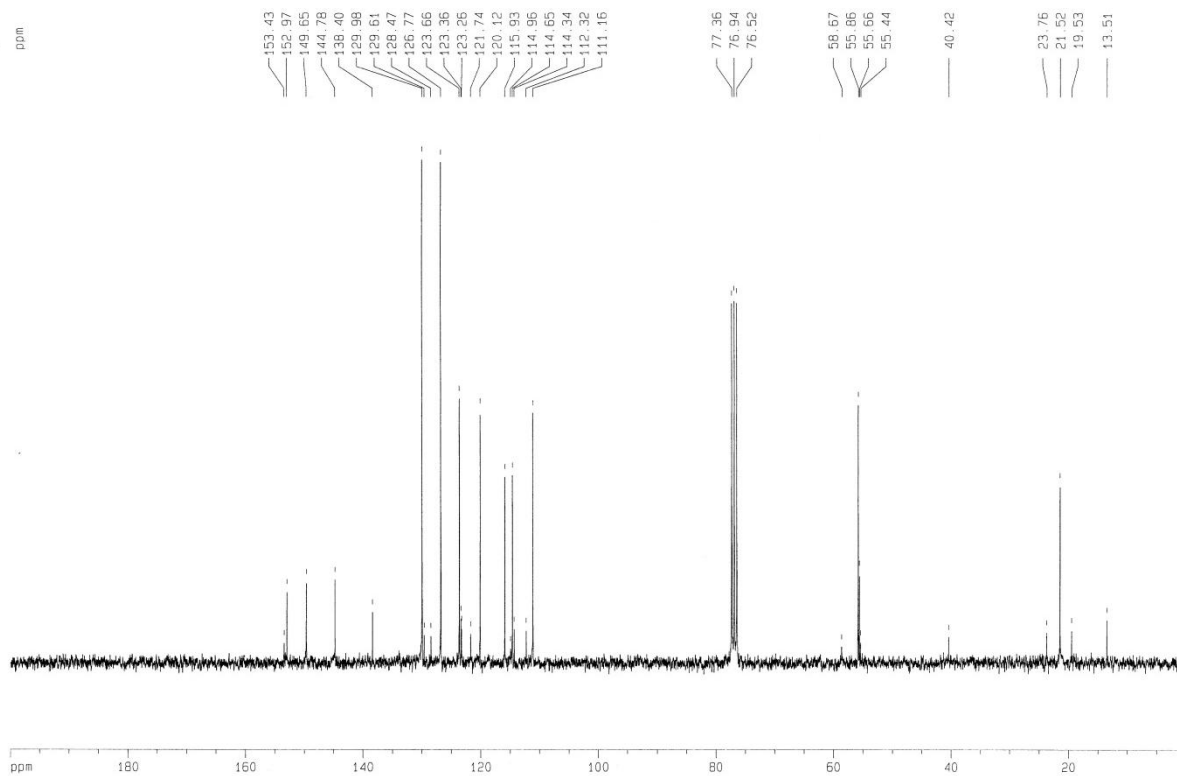

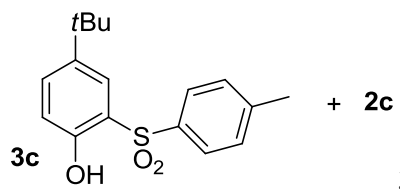

**3c**,  $^1\text{H}$  NMR of the mixture ( $\delta$ ,  $\text{CDCl}_3$ ).

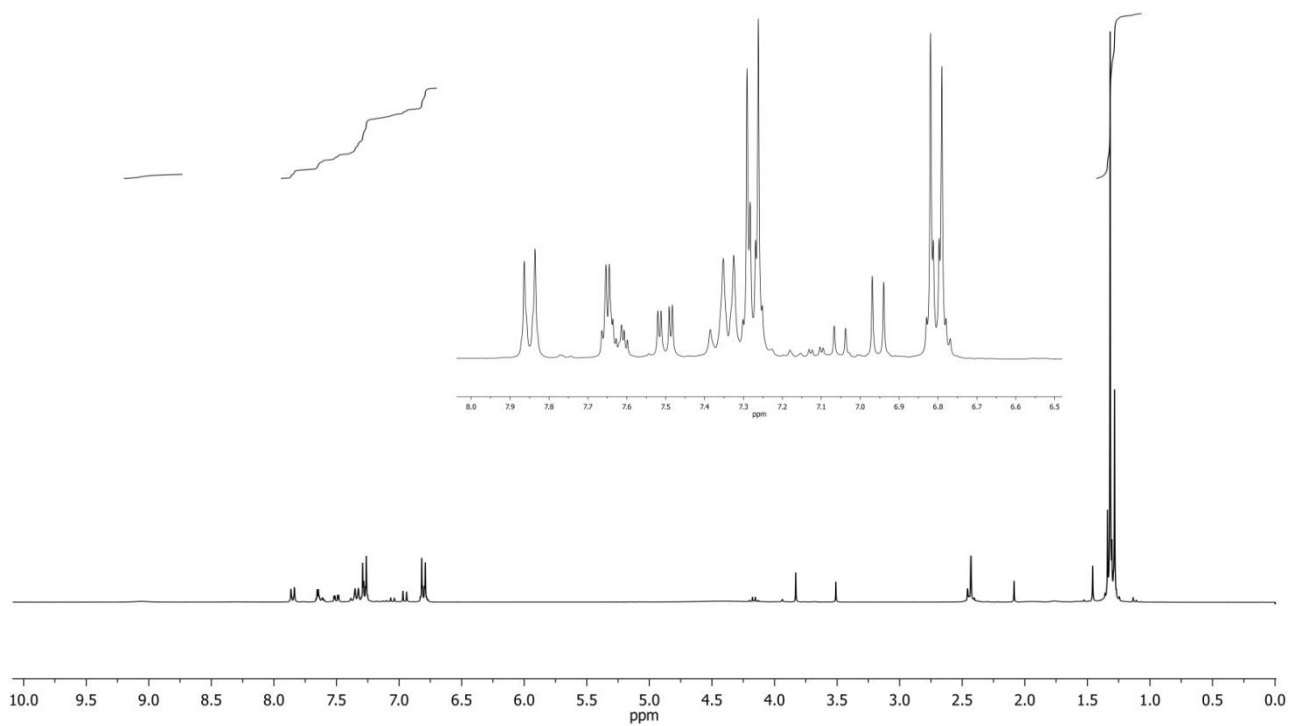

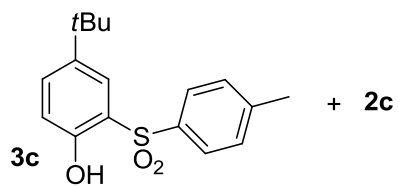

**3c**,  $^{13}\text{C}$  NMR of the mixture ( $\delta$ ,  $\text{CDCl}_3$ ).

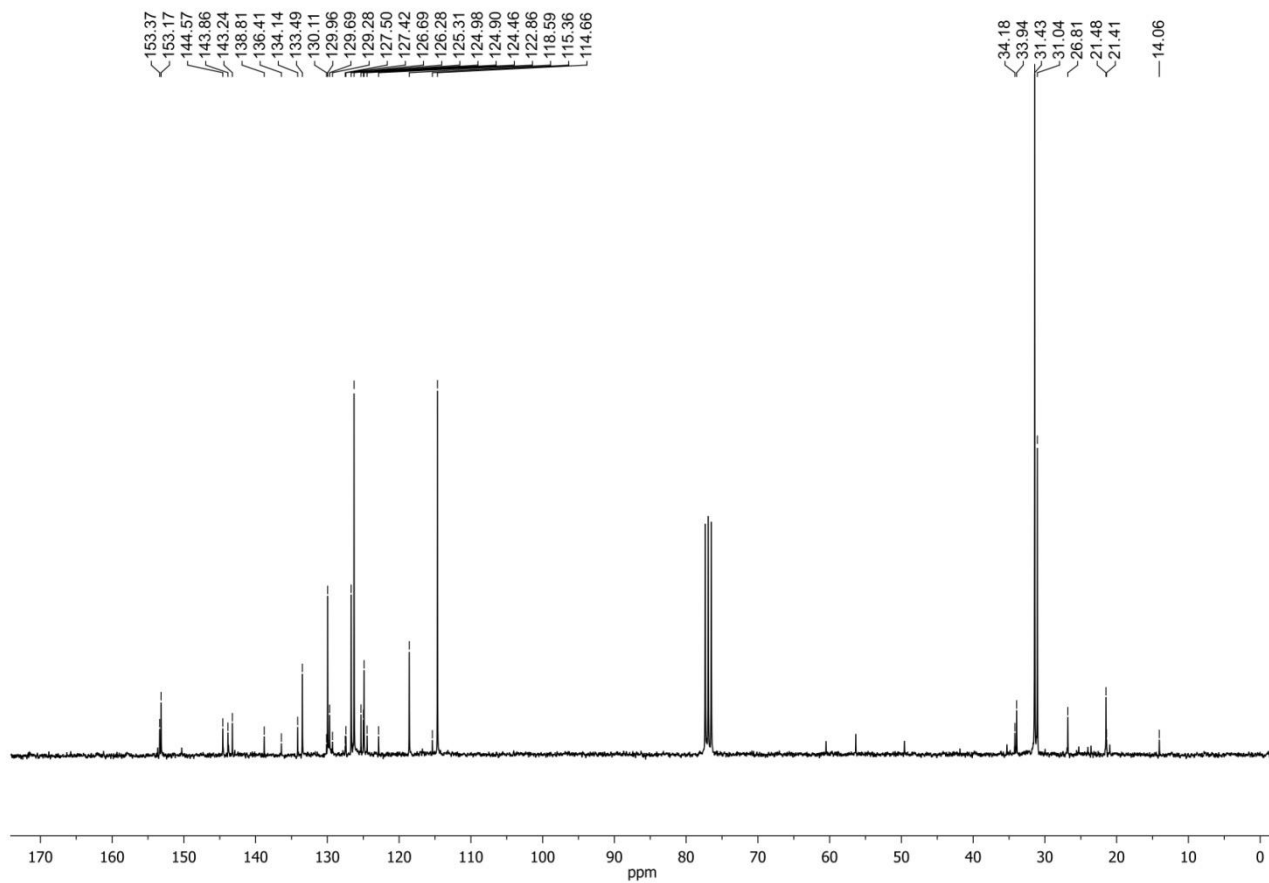

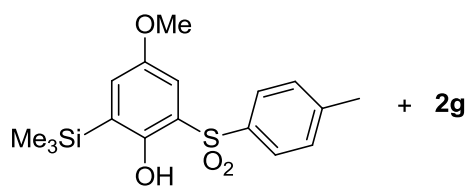

**3g**

**3g**,  $^1\text{H}$  NMR of the mixture ( $\delta$ ,  $\text{CDCl}_3$ ).

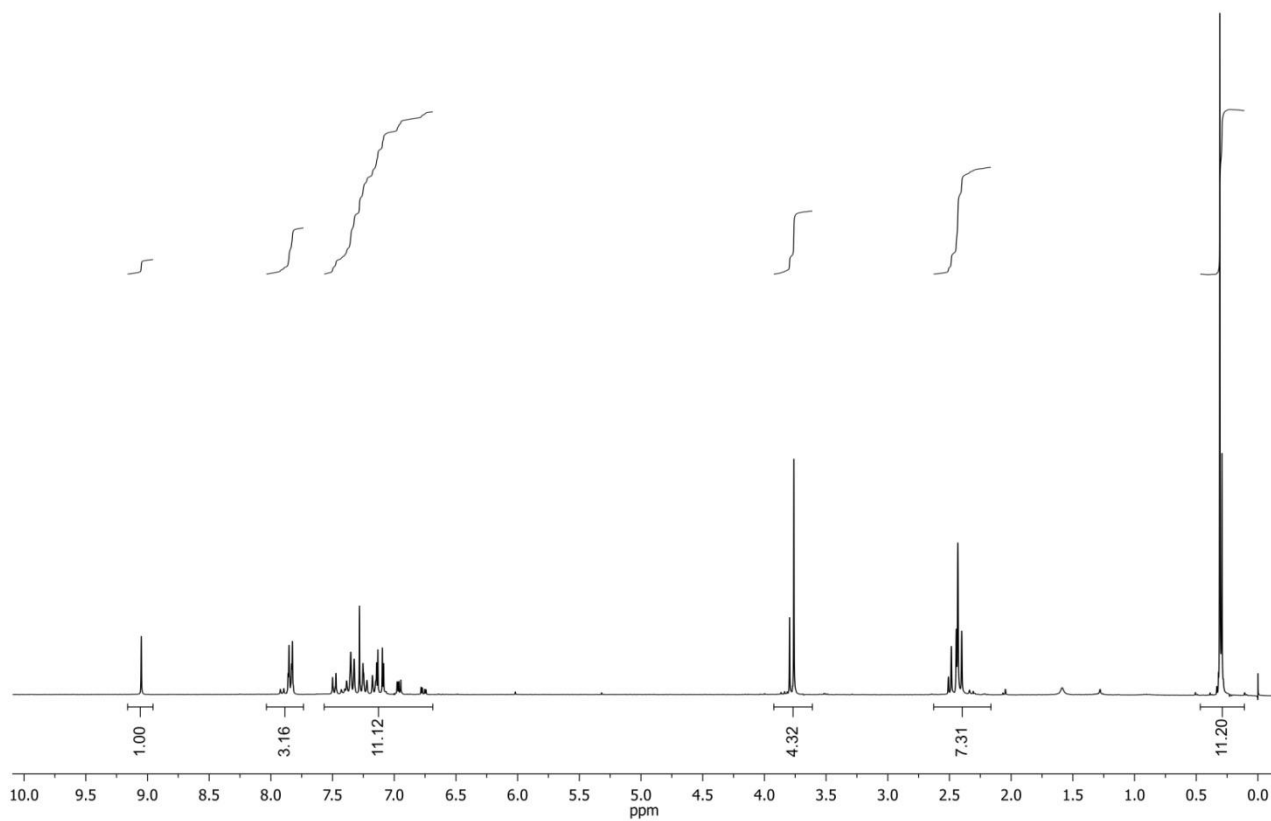

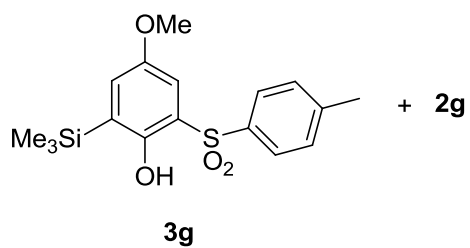

**3g**,  $^{13}\text{C}$  NMR of the mixture ( $\delta$ ,  $\text{CDCl}_3$ ).

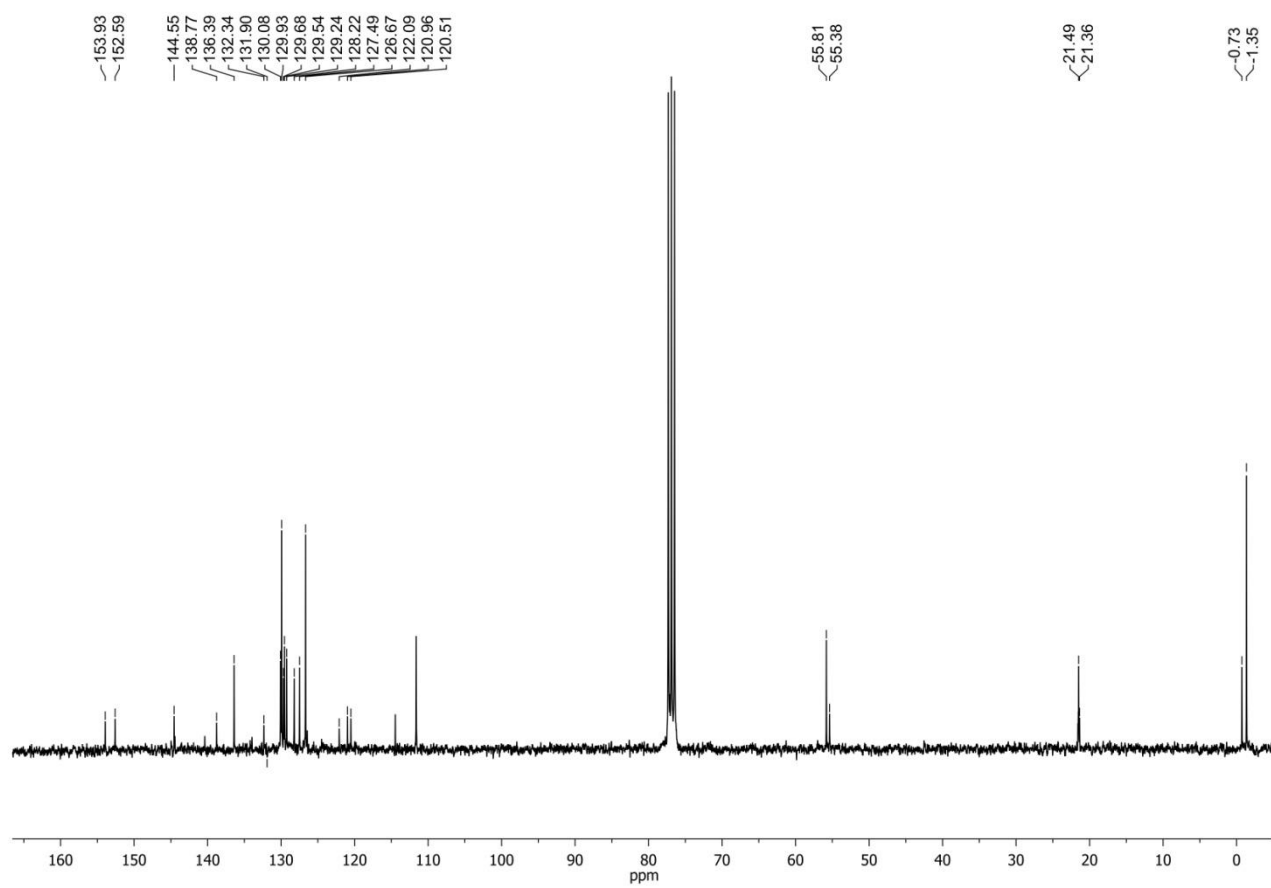

Supplement: c5ra03522h1.pdf [file c5ra03522h1.pdf]
